# Supplementary material for: Copper-catalyzed hydroxylation of aryl halides: efficient synthesis of phenols, alkyl aryl ethers and benzofuran derivatives in neat water
Source: Royal Society of Chemistry journal article supplement (doi:10.1039/c5gc00871a), 2015-01-01
Supplement: c5gc00871a1.pdf [file c5gc00871a1.pdf]

## Supporting Information

for

### Copper-Catalyzed Hydroxylation of Aryl Halides: Efficient Synthesis of Phenols, Alkyl Aryl Ethers and Benzofuran Derivatives in Neat Water

Yangxin Wang<sup>a, b</sup>, Chunshan Zhou<sup>a</sup>, Ruihu Wang<sup>\*a</sup>

<sup>a</sup> State Key Laboratory of Structural Chemistry, Fujian Institute of Research on the Structure of Matter, Chinese Academy of Sciences, Fuzhou, Fujian, 350002, China.

Email: [ruihu@fjirsm.ac.cn](mailto:ruihu@fjirsm.ac.cn)

<sup>b</sup> University of Chinese Academy of Sciences, Beijing, 100049, China.

#### NMR data

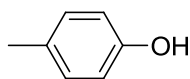

*p*-cresol<sup>1</sup>: <sup>1</sup>H NMR (400 MHz, [D<sub>1</sub>]CDCl<sub>3</sub>): δ 7.08 (d, *J* = 8.2 Hz, 2H), 6.78 (d, *J* = 8.3 Hz, 2H), 5.29 (s, 1H), 2.32 (s, 3H); <sup>13</sup>C NMR (100 MHz, [D<sub>1</sub>]CDCl<sub>3</sub>): δ 153.1, 130.1, 130.0, 115.2, 20.5.

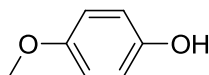

*p*-methoxyphenol<sup>2</sup>: <sup>1</sup>H NMR (400 MHz, [D<sub>1</sub>]CDCl<sub>3</sub>): δ 6.83~6.78 (m, 4H), 5.10 (s, 1H), 3.79 (s, 3H); <sup>13</sup>C NMR (100 MHz, [D<sub>1</sub>]CDCl<sub>3</sub>): δ 155.4, 139.9, 129.5, 121.7, 116.7, 112.3, 21.3.

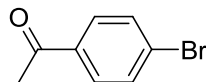

1-(4-hydroxyphenyl)ethanone<sup>1</sup>: <sup>1</sup>H NMR (400 MHz, [D<sub>1</sub>]CDCl<sub>3</sub>): δ 7.93 (d, *J* = 8.8 Hz, 2H), 6.97 (d, *J* = 8.7 Hz, 2H), 2.61 (s, 3H); <sup>13</sup>C NMR (100 MHz, [D<sub>1</sub>]CDCl<sub>3</sub>): δ 198.6, 161.4, 131.2, 129.6, 115.6, 26.3.

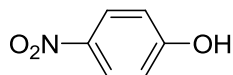

*p*-nitrophenol<sup>3</sup>: <sup>1</sup>H NMR (400 MHz, [D<sub>1</sub>]CDCl<sub>3</sub>): δ 8.20 (d, *J* = 9.0 Hz, 2H), 6.96 (d, *J* = 9.0 Hz, 2H), 6.24 (s, 1H); <sup>13</sup>C NMR (100 MHz, [D<sub>1</sub>]CDCl<sub>3</sub>): δ 161.5, 141.6, 126.3, 115.8.

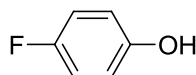

*p*-fluorophenol<sup>1</sup>: <sup>1</sup>H NMR (400 MHz, [D<sub>1</sub>]CDCl<sub>3</sub>): δ 6.97~6.92 (m, 2H), 6.81~6.78 (m, 2H), 5.00 (br, 1H); <sup>13</sup>C NMR (100 MHz, [D<sub>1</sub>]CDCl<sub>3</sub>): δ 158.6, 156.3, 151.2, 116.3.

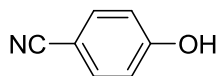

*p*-hydroxybenzonitrile<sup>4</sup>: <sup>1</sup>H NMR (400 MHz, [D<sub>6</sub>]DMSO): δ 10.40 (s, 1H), 7.79 (d, *J*= 8.4 Hz, 2H), 6.82 (d, *J*= 8.4 Hz, 2H); <sup>13</sup>C NMR (100 MHz, [D<sub>6</sub>]DMSO): δ 167.6, 162.0, 132.0, 121.8, 115.6.

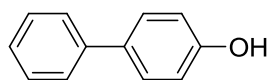

biphenyl-4-ol<sup>1</sup>: <sup>1</sup>H NMR (400 MHz, [D<sub>1</sub>]CDCl<sub>3</sub>): δ 7.57 (d, *J*= 8.0 Hz, 2H), 7.51 (d, *J*= 7.6 Hz, 2H), 7.44 (t, *J*= 7.1 Hz, 2H), 7.34 (t, *J*= 6.8 Hz, 1H), 6.94 (d, *J*= 7.6, 2H), 4.78 (s, 1H); <sup>13</sup>C NMR (100 MHz, [D<sub>1</sub>]CDCl<sub>3</sub>): δ 155.0, 140.8, 134.1, 128.7, 128.4, 126.7, 115.7.

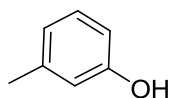

*m*-cresol<sup>2</sup>: <sup>1</sup>H NMR (400 MHz, [D<sub>1</sub>]CDCl<sub>3</sub>): δ 7.16 (t, *J*= 7.7 Hz, 1H), 6.80 (d, *J*= 7.5 Hz, 1H), 6.70~6.68 (m, 2H), 5.12 (s, 1H), 2.34 (s, 3H); <sup>13</sup>C NMR (100 MHz, [D<sub>1</sub>]CDCl<sub>3</sub>): δ 155.4, 139.9, 129.5, 121.7, 116.1, 112.3, 21.3.

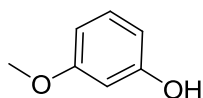

*m*-methoxyphenol<sup>1</sup>: <sup>1</sup>H NMR (400 MHz, [D<sub>1</sub>]CDCl<sub>3</sub>): δ 7.16 (t, *J*= 8.2 Hz, 1H), 6.52 (m, 1H), 6.45 (m, 2H), 5.00 (s, 3H); <sup>13</sup>C NMR (100 MHz, [D<sub>1</sub>]CDCl<sub>3</sub>): δ 160.9, 156.7, 130.2, 107.9, 106.5, 101.6, 55.3.

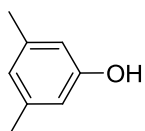

3,5-dimethylphenol<sup>3</sup>: <sup>1</sup>H NMR (400 MHz, [D<sub>1</sub>]CDCl<sub>3</sub>): δ 6.60 (s, 1H), 6.49 (s, 2H), 3.98 (s, 1H), 2.29 (s, 6H); <sup>13</sup>C NMR (100 MHz, [D<sub>1</sub>]CDCl<sub>3</sub>): δ 155.5, 139.5, 122.5, 113.1, 21.2.

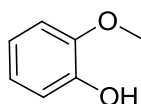

*o*-methoxyphenol: <sup>1</sup>H NMR (400 MHz, [D<sub>1</sub>]CDCl<sub>3</sub>): δ 6.93 (m, 4H), 5.63 (s, 1H), 3.92 (s, 3H); <sup>13</sup>C NMR (100 MHz, [D<sub>1</sub>]CDCl<sub>3</sub>): δ 146.6, 145.7, 121.5, 120.1, 114.5, 110.7, 55.9.

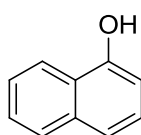

naphthalen-1-ol<sup>1</sup>: <sup>1</sup>H NMR (400 MHz, [D<sub>1</sub>]CDCl<sub>3</sub>): δ 8.25~8.27 (m, 1H), 7.87~7.90

(m, 1H), 7.51~7.58 (m, 3H), 7.36 (t,  $J=7.7$  Hz, 1H), 6.85 (d,  $J=7.4$  Hz, 1H), 5.48 (s, 1H);  $^{13}\text{C}$  NMR (100 MHz,  $[\text{D}_1]\text{CDCl}_3$ ):  $\delta$  151.4, 134.8, 127.8, 126.5, 125.9, 125.4, 124.4, 121.6, 120.8, 108.8.

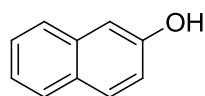

naphthalen-2-ol<sup>3</sup>:  $^1\text{H}$  NMR (400 MHz,  $[\text{D}_1]\text{CDCl}_3$ ):  $\delta$  7.79 (t,  $J=7.2$  Hz, 2H), 7.71 (d,  $J=8.2$  Hz, 1H), 7.46 (t,  $J=7.4$  Hz, 1H), 7.36 (t,  $J=7.7$  Hz, 1H), 7.17 (s, 1H), 7.13 (d,  $J=8.8$  Hz, 1H), 4.96 (s, 1H);  $^{13}\text{C}$  NMR (100 MHz,  $[\text{D}_1]\text{CDCl}_3$ ):  $\delta$  153.3, 134.6, 129.9, 129.0, 127.8, 126.4, 123.8, 123.5, 117.7, 109.5

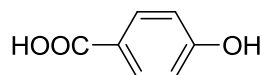

*p*-hydroxybenzoic acid<sup>3</sup>:  $^1\text{H}$  NMR (400 MHz,  $[\text{D}_6]\text{DMSO}$ ):  $\delta$  12.39 (s, 1H), 10.19 (s, 1H), 7.79 (d,  $J=8.6$  Hz, 2H), 6.82 (d,  $J=8.6$  Hz, 2H);  $^{13}\text{C}$  NMR (100 MHz,  $[\text{D}_6]\text{DMSO}$ ):  $\delta$  167.6, 162.0, 132.0, 121.8, 115.6.

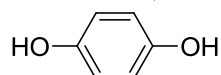

Hydroquinone<sup>5</sup>:  $^1\text{H}$  NMR (400 MHz,  $[\text{D}_6]\text{DMSO}$ ):  $\delta$  8.60 (s, 2H), 6.56 (s, 4H);  $^{13}\text{C}$  NMR (100 MHz,  $[\text{D}_6]\text{DMSO}$ ):  $\delta$  150.2, 116.1.

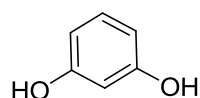

Resorcinol<sup>6</sup>:  $^1\text{H}$  NMR (400 MHz,  $[\text{D}_6]\text{DMSO}$ ):  $\delta$  9.12 (s, 2H), 6.94~6.90 (m, 1H), 6.20~6.18 (m, 3H);  $^{13}\text{C}$  NMR (100 MHz,  $[\text{D}_6]\text{DMSO}$ ):  $\delta$  158.9, 130.1, 106.7, 103.0.

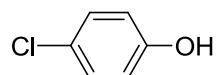

*p*-chlorophenol<sup>3</sup>:  $^1\text{H}$  NMR (400 MHz,  $[\text{D}_1]\text{CDCl}_3$ ):  $\delta$  7.22 (d,  $J=8.8$  Hz, 2H), 6.79 (d,  $J=8.8$  Hz, 2H), 5.00 (s, 1H);  $^{13}\text{C}$  NMR (100 MHz,  $[\text{D}_1]\text{CDCl}_3$ ):  $\delta$  154.1, 129.5, 125.7, 116.7.

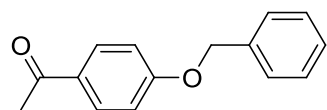

1-(4-(benzyloxy)phenyl)ethanone<sup>7</sup>:  $^1\text{H}$  NMR (400 MHz,  $[\text{D}_1]\text{CDCl}_3$ ):  $\delta$  7.96 (d,  $J=8.7$  Hz, 2H), 7.46~7.37 (m, 5H), 7.03 (d,  $J=8.7$  Hz, 2H), 5.16 (s, 2H), 2.58 (s, 3H);  $^{13}\text{C}$  NMR (100 MHz,  $[\text{D}_1]\text{CDCl}_3$ ):  $\delta$  196.7, 162.6, 136.2, 130.6, 128.7, 128.2, 127.5, 114.6, 70.2, 26.3.

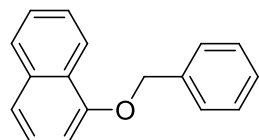

1-(benzyloxy)naphthalene<sup>8</sup>:  $^1\text{H}$  NMR (400 MHz,  $[\text{D}_1]\text{CDCl}_3$ ):  $\delta$  7.81~7.75 (m, 3H), 7.53~7.35 (m, 7H), 7.28~7.26 (m, 2H), 5.22 (s, 2H);  $^{13}\text{C}$  NMR (100 MHz,  $[\text{D}_1]\text{CDCl}_3$ ):  $\delta$  156.8, 136.9, 134.5, 129.5, 129.1, 128.6, 128.0, 127.7, 127.6, 126.8, 126.4, 123.7, 119.1, 107.2, 70.1.

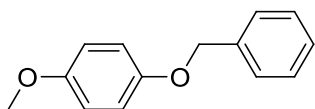

1-(benzyloxy)-4-methoxybenzene<sup>8</sup>: <sup>1</sup>H NMR (400 MHz, [D<sub>1</sub>]CDCl<sub>3</sub>): δ 7.47~7.33 (m, 5H), 6.96~6.86 (m, 4H), 5.05 (s, 2H), 3.80 (s, 3H); <sup>13</sup>C NMR (100 MHz, [D<sub>1</sub>]CDCl<sub>3</sub>): δ 154.0, 153.0, 137.4, 128.6, 127.9, 127.5, 115.9, 114.7, 70.8, 55.8.

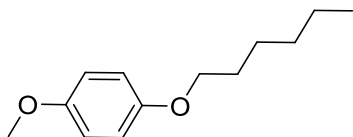

1-(hexyloxy)-4-methoxybenzene<sup>9</sup>: <sup>1</sup>H NMR (400 MHz, [D<sub>1</sub>]CDCl<sub>3</sub>): δ 6.86 (s, 4H), 3.93 (t, *J* = 6.6 Hz, 2H), 3.79 (s, 3H), 1.82~1.75 (m, 2H), 1.50~1.46 (m, 2H), 1.38~1.36 (m, 4H), 0.96~0.92 (m, 3H); <sup>13</sup>C NMR (100 MHz, [D<sub>1</sub>]CDCl<sub>3</sub>): δ 153.7, 153.4, 115.5, 114.6, 68.7, 55.7, 31.6, 29.4, 25.8, 22.6, 14.0.

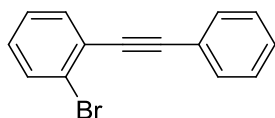

1-bromo-2-(phenylethynyl)benzene<sup>10</sup>: <sup>1</sup>H NMR (400 MHz, [D<sub>1</sub>]CDCl<sub>3</sub>): δ 7.66~7.58 (m, 4H), 7.40~7.38 (m, 3H), 7.34~7.30 (m, 1H), 7.29~7.19 (m, 1H); <sup>13</sup>C NMR (100 MHz, [D<sub>1</sub>]CDCl<sub>3</sub>): δ 133.2, 132.5, 131.7, 129.4, 128.7, 128.4, 127.0, 125.7, 125.4, 123.0, 94.0, 88.0.

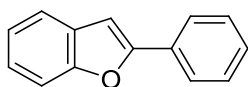

2-phenylbenzofuran<sup>11</sup>: <sup>1</sup>H NMR (400 MHz, [D<sub>1</sub>]CDCl<sub>3</sub>): δ 7.92~7.90 (m, 2H), 7.62~7.61 (m, 1H), 7.57~7.55 (m, 1H), 7.50~7.46 (m, 2H), 7.40~7.37 (m, 1H), 7.30~7.24 (m, 2H), 7.06 (d, *J* = 0.7, 1H); <sup>13</sup>C NMR (100 MHz, [D<sub>1</sub>]CDCl<sub>3</sub>): δ 155.9, 154.9, 130.5, 129.2, 128.8, 128.6, 125.0, 124.3, 122.9, 120.9, 111.2, 101.3.

# NMR Spectra

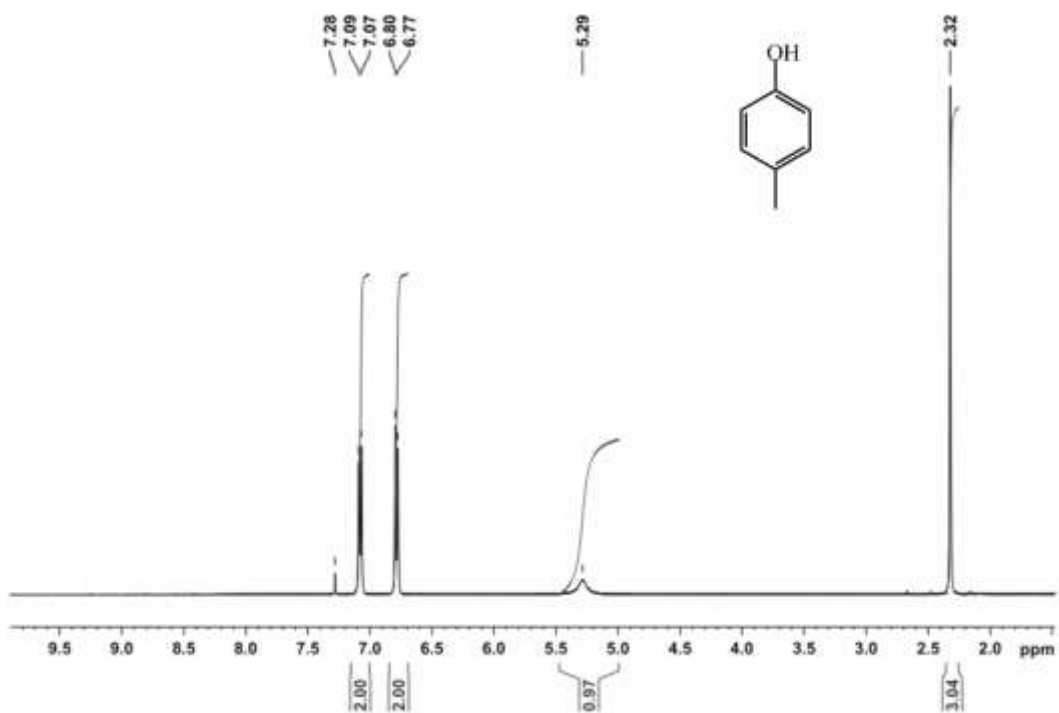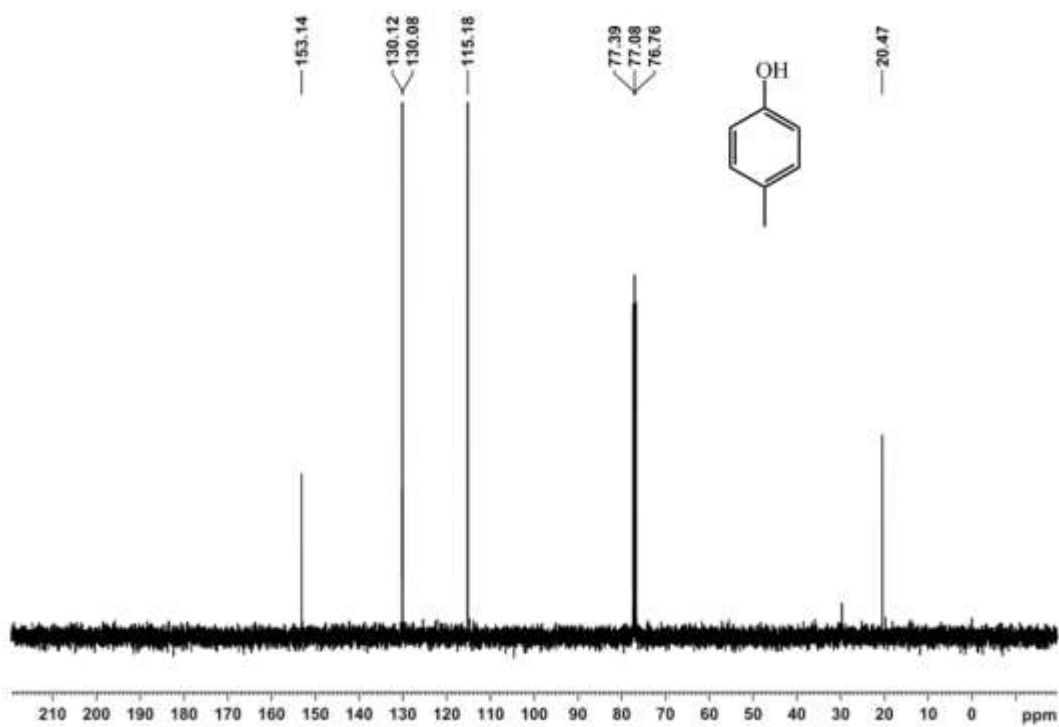

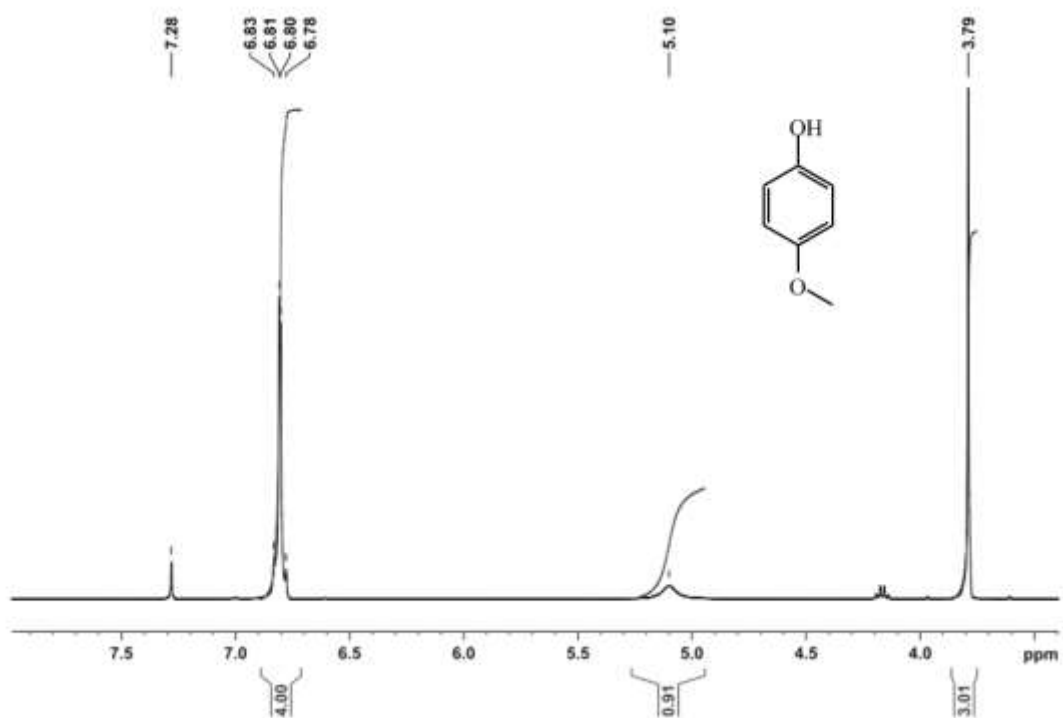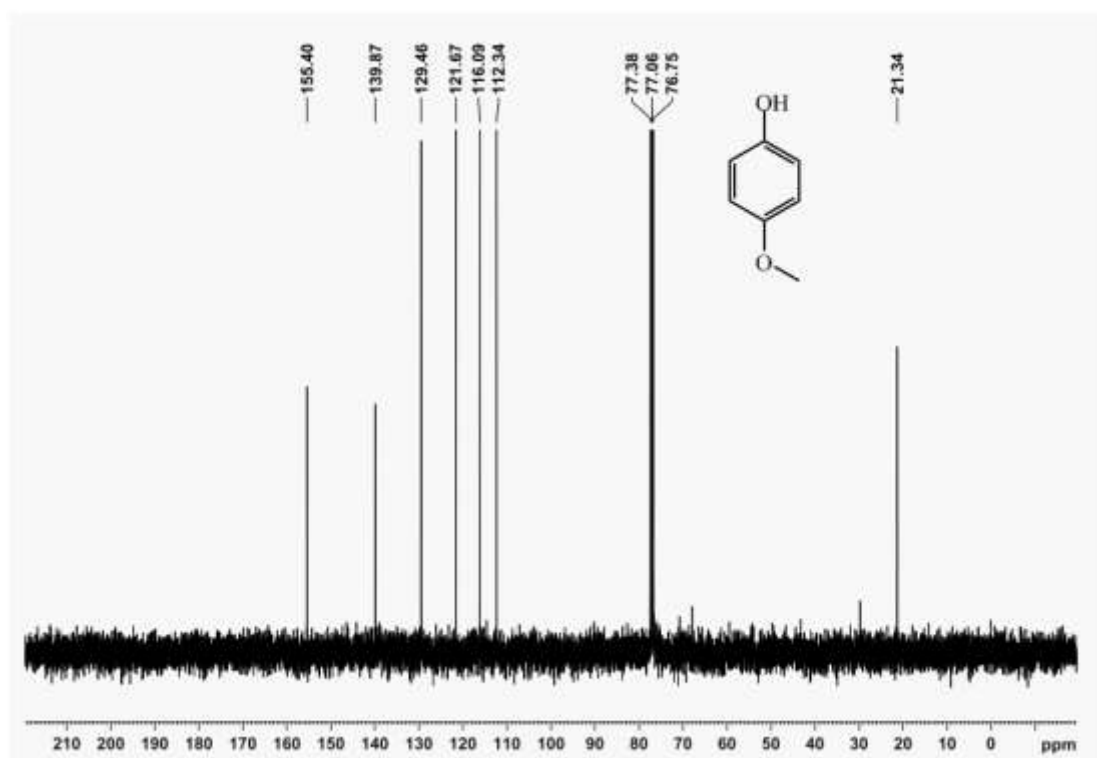

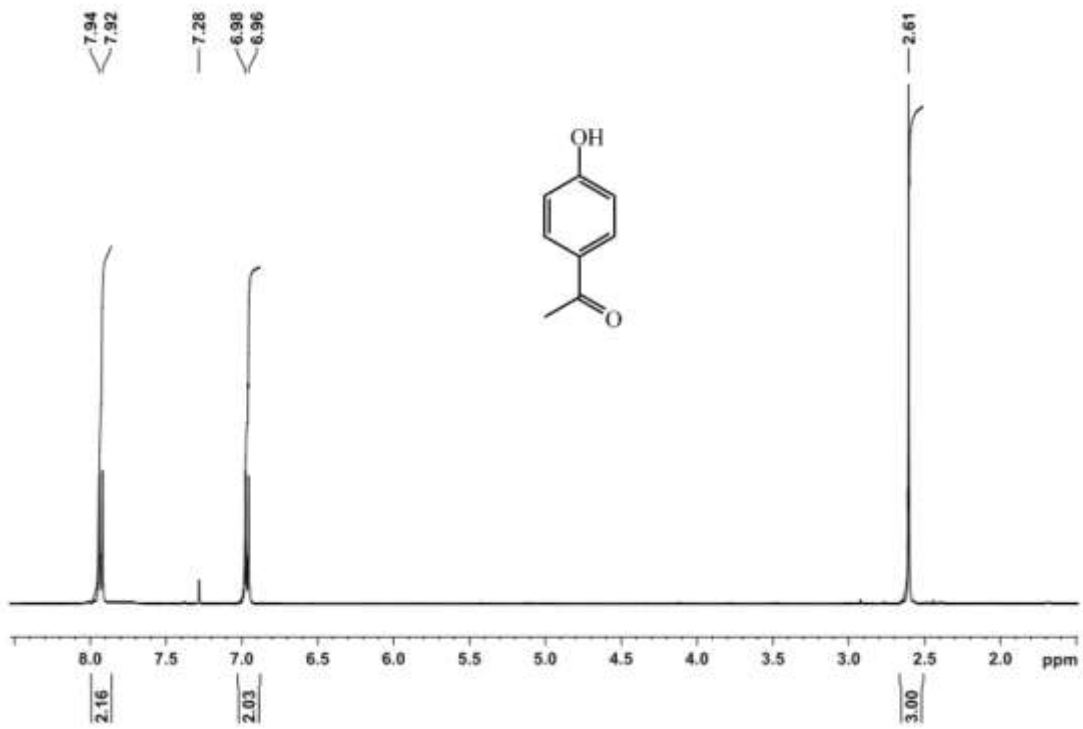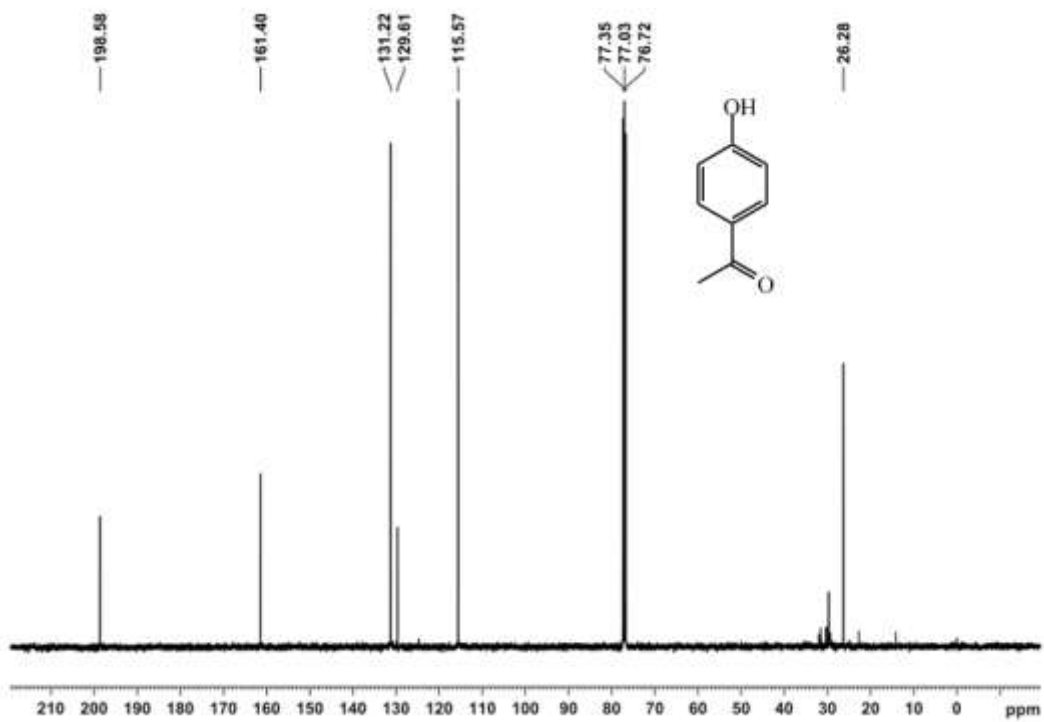

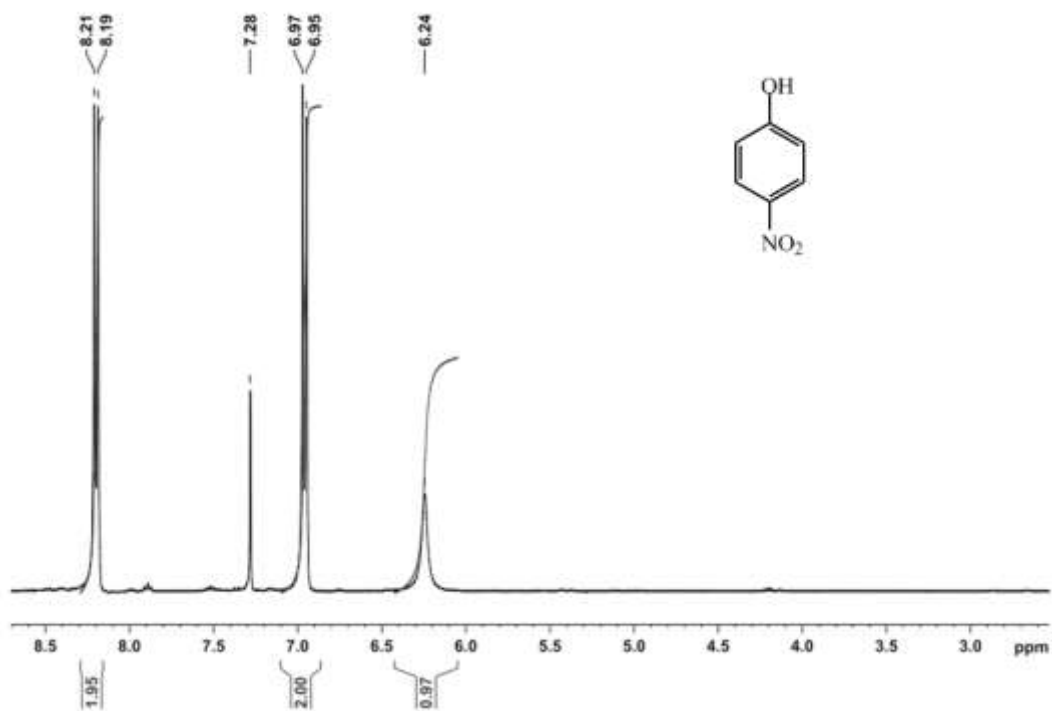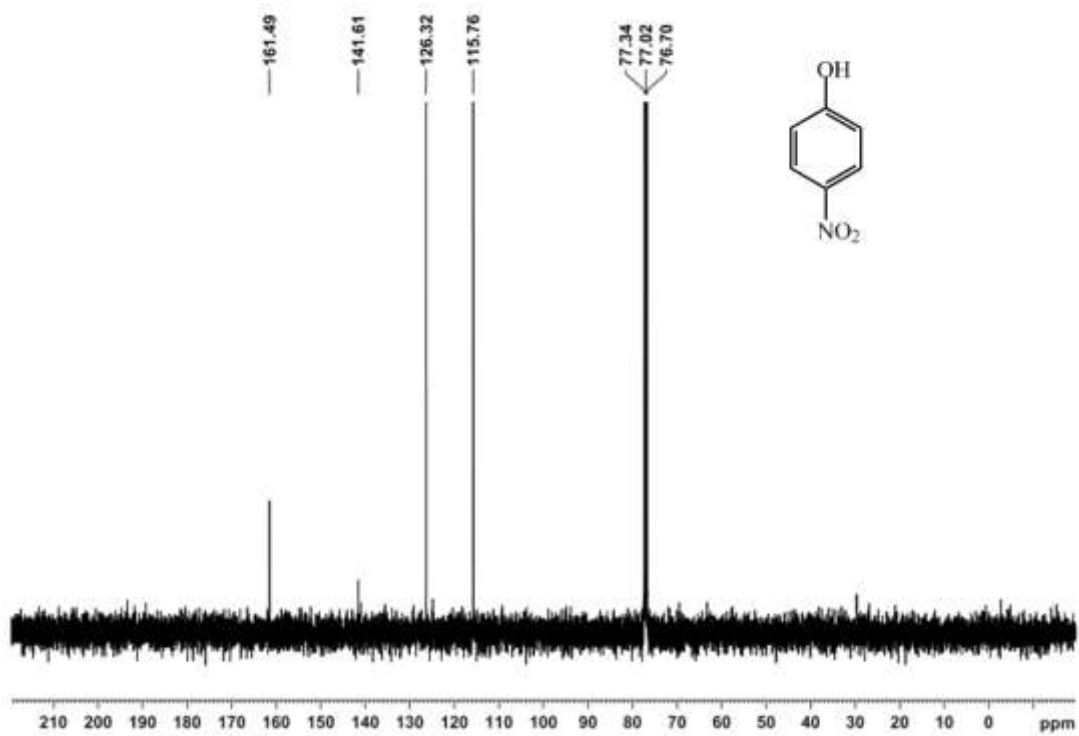



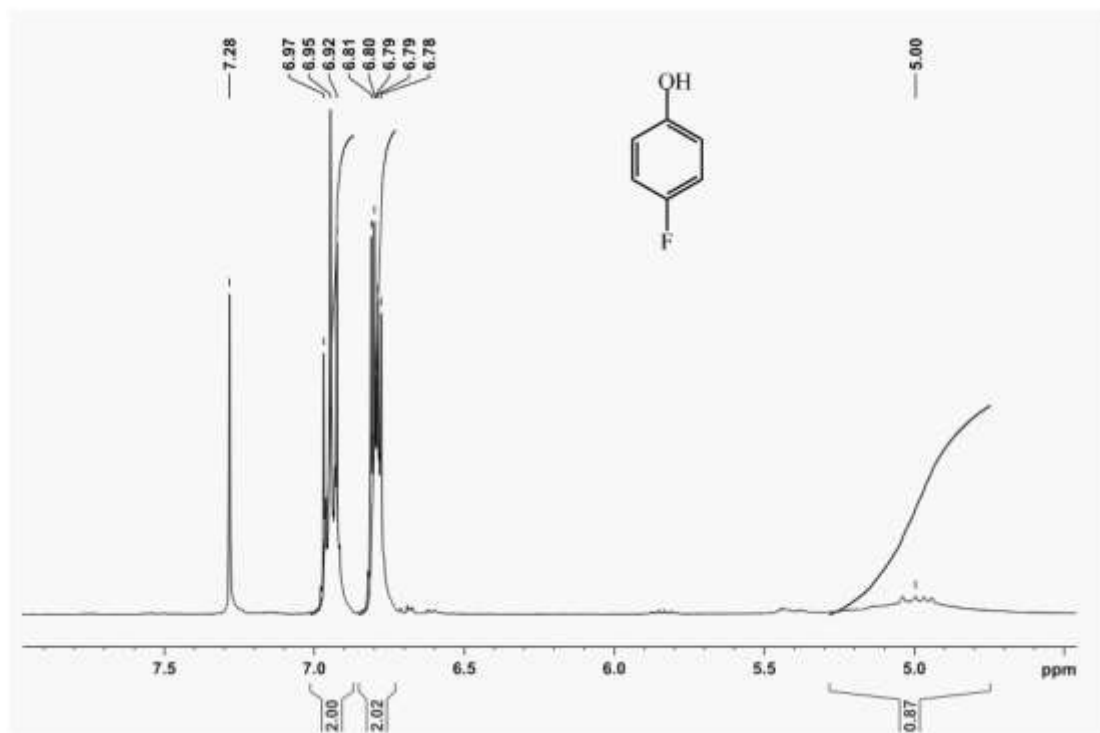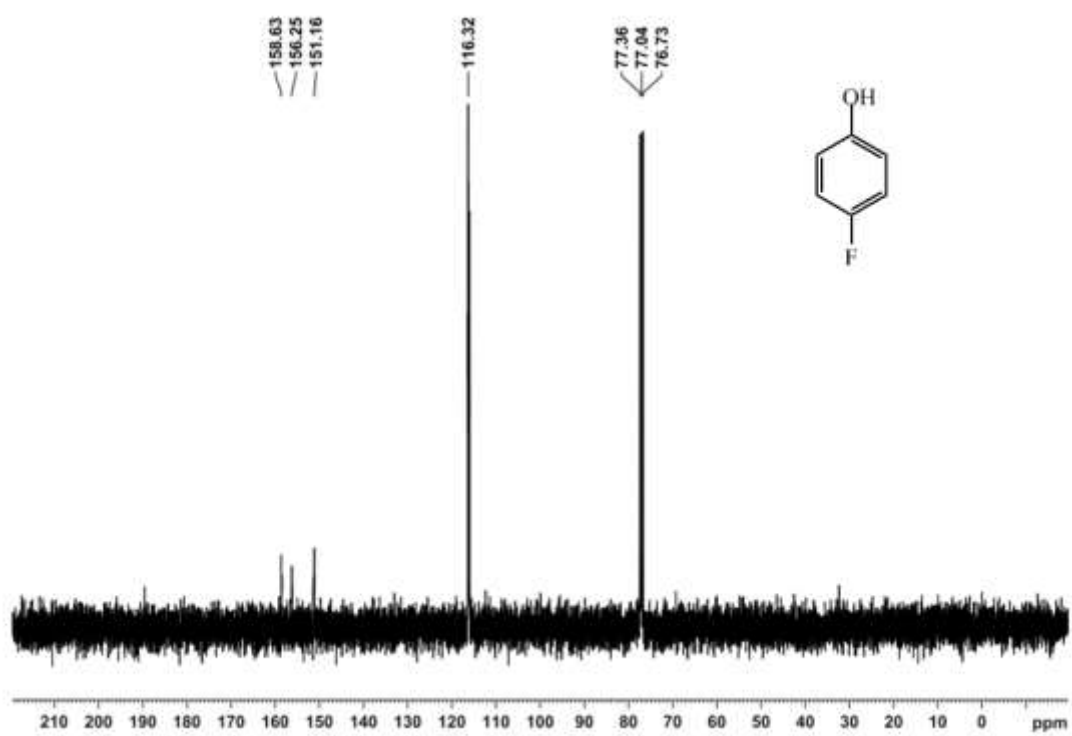

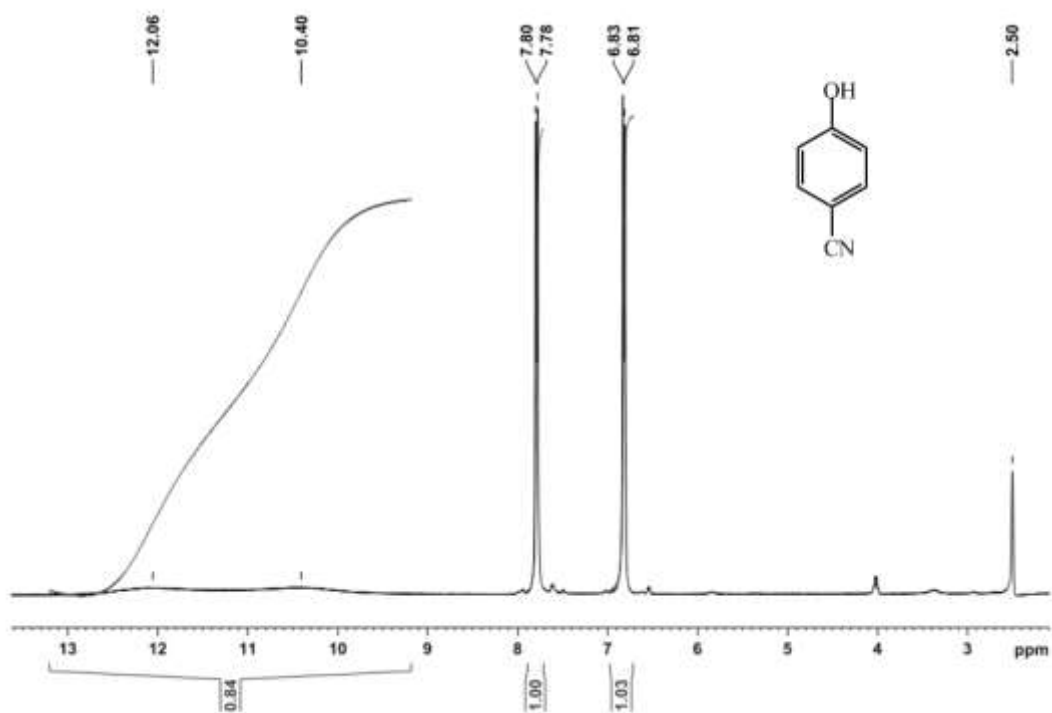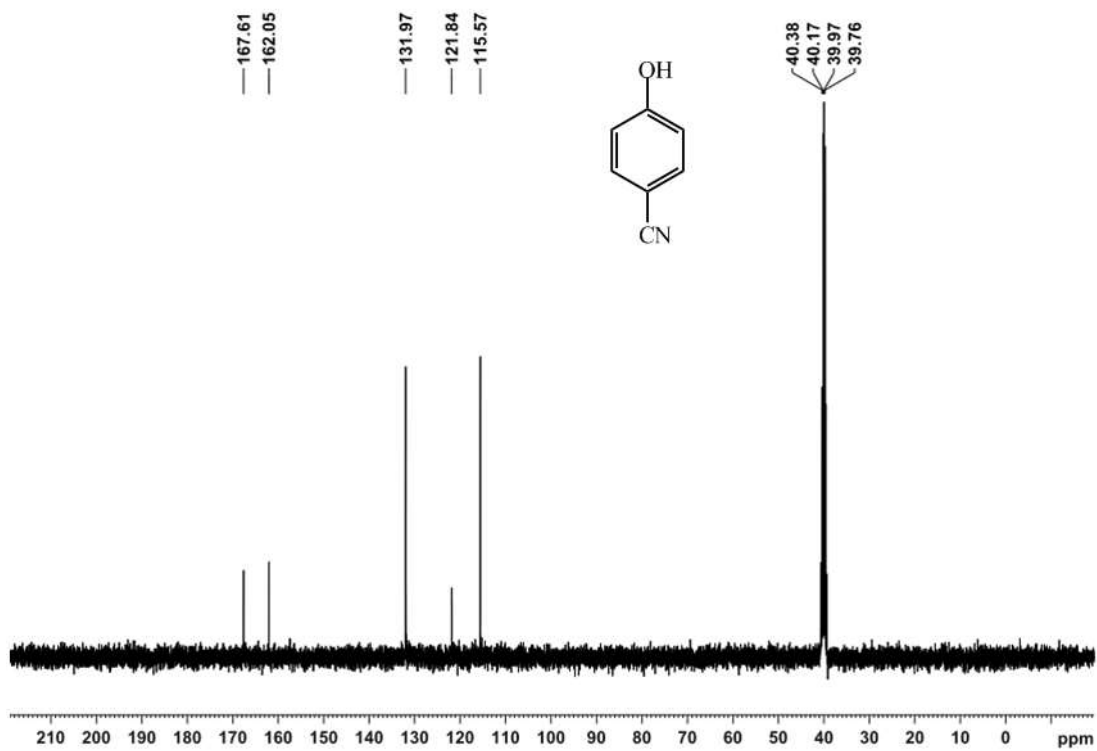

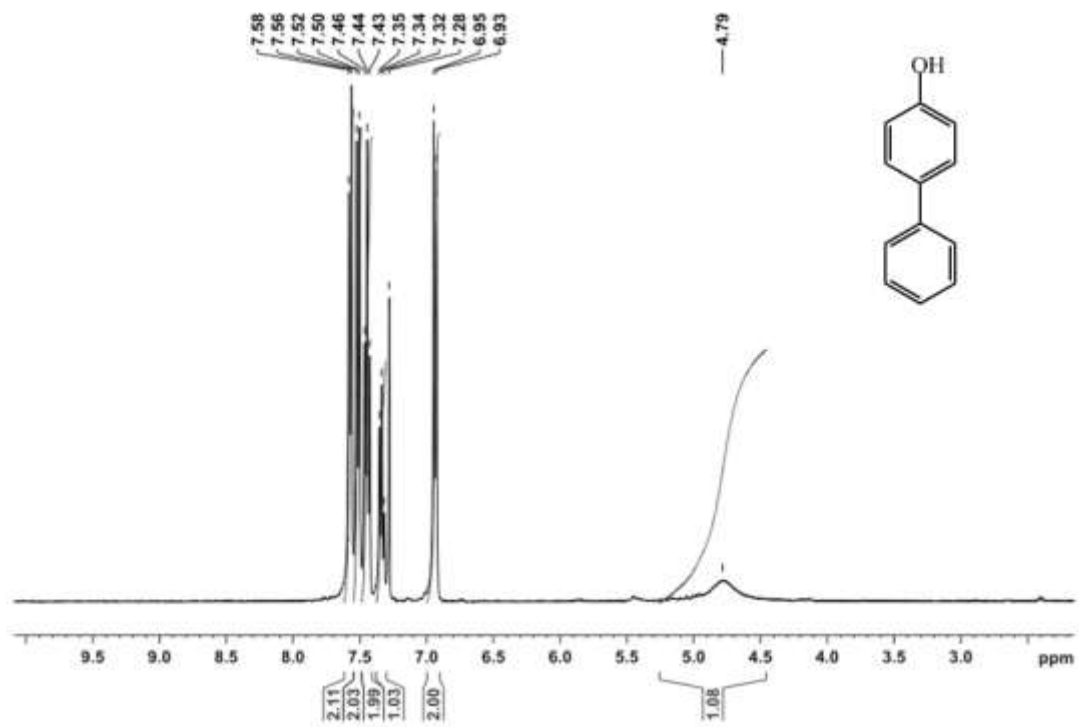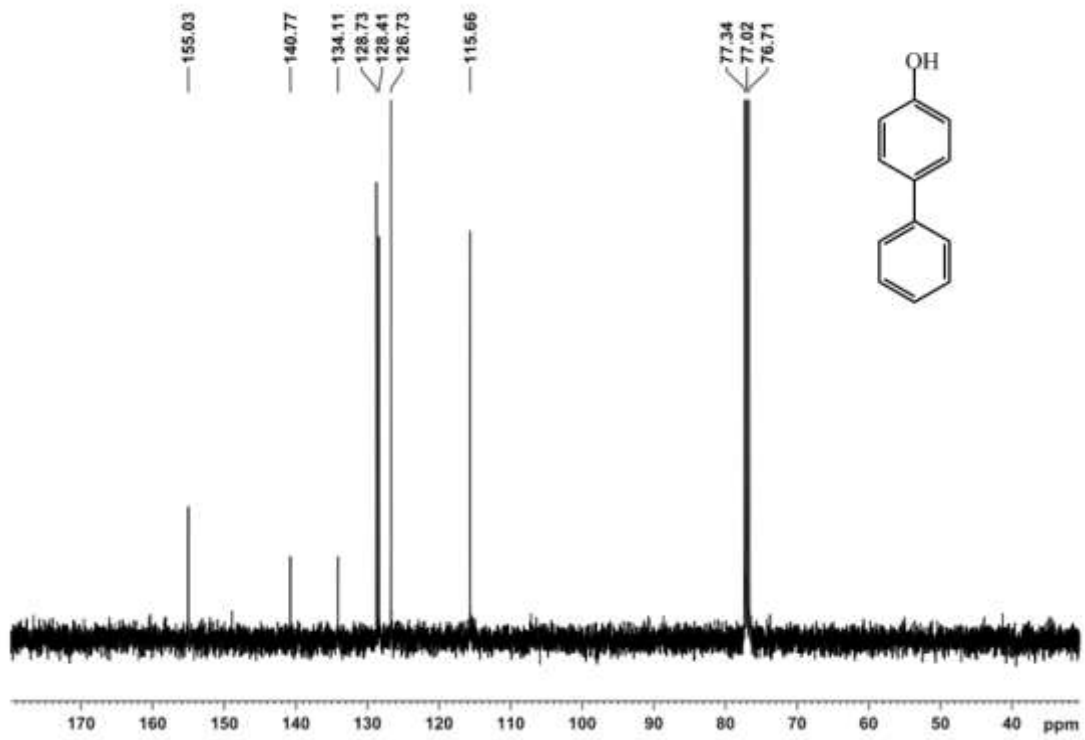

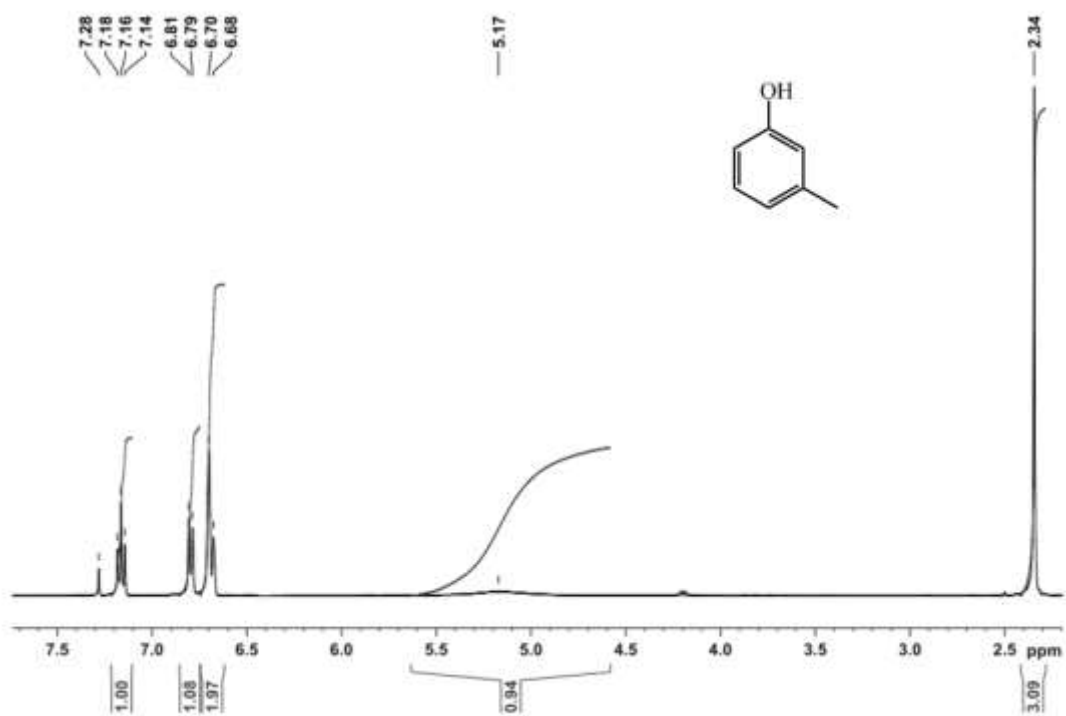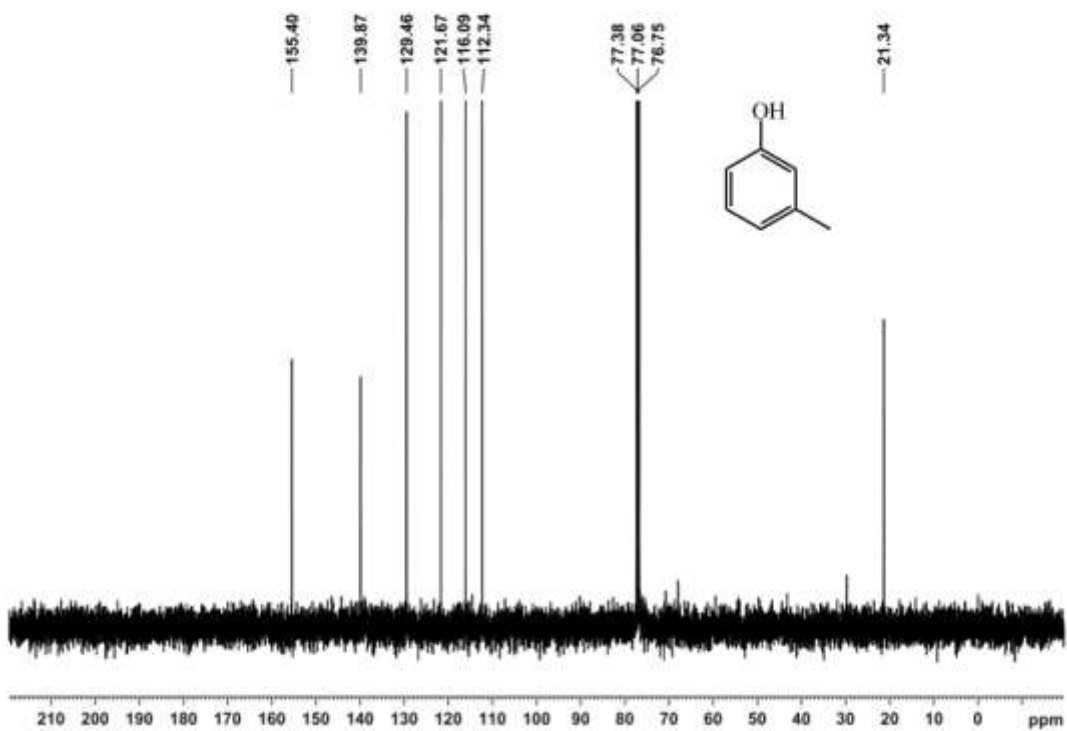

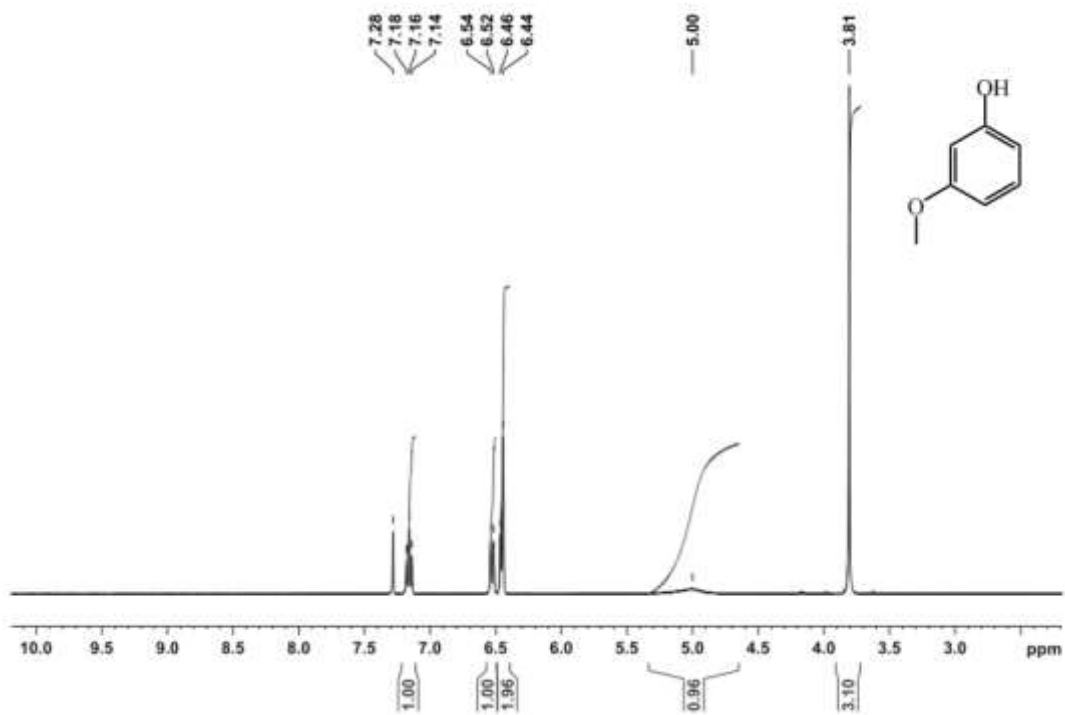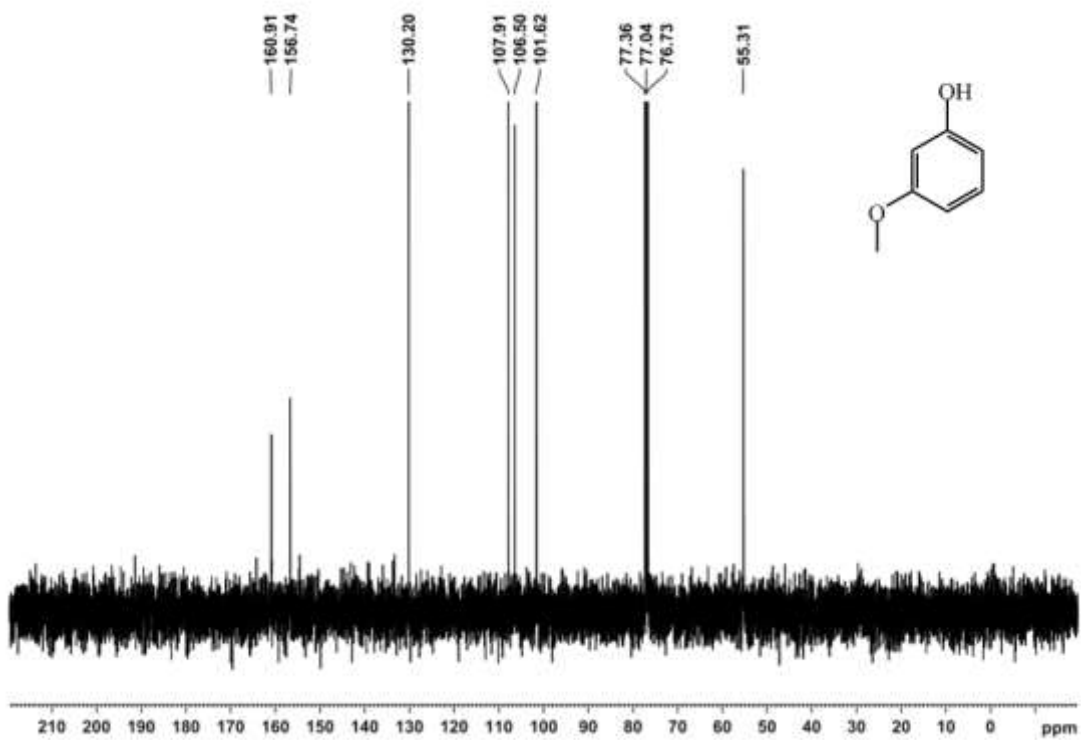

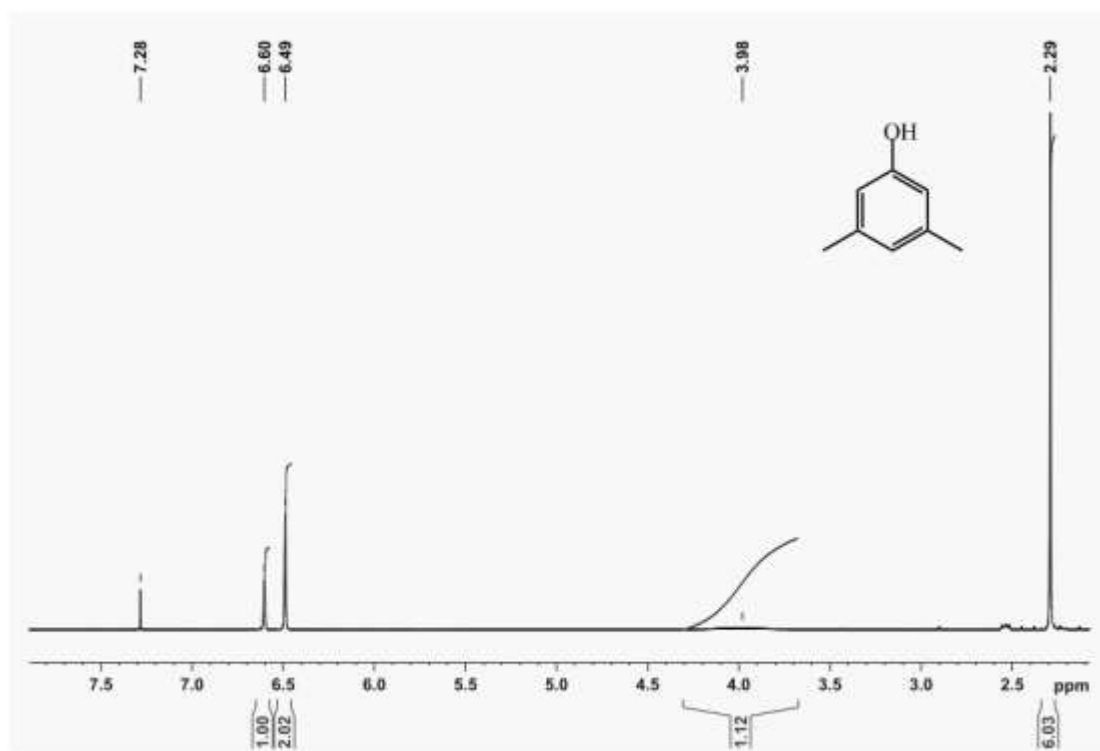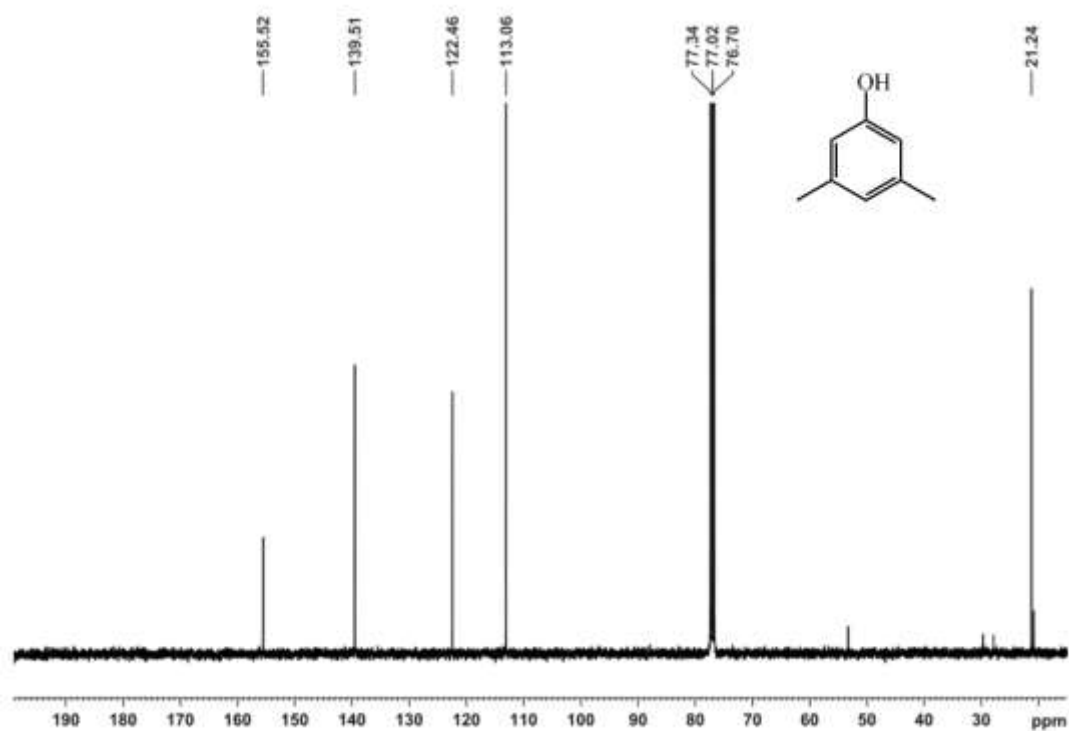

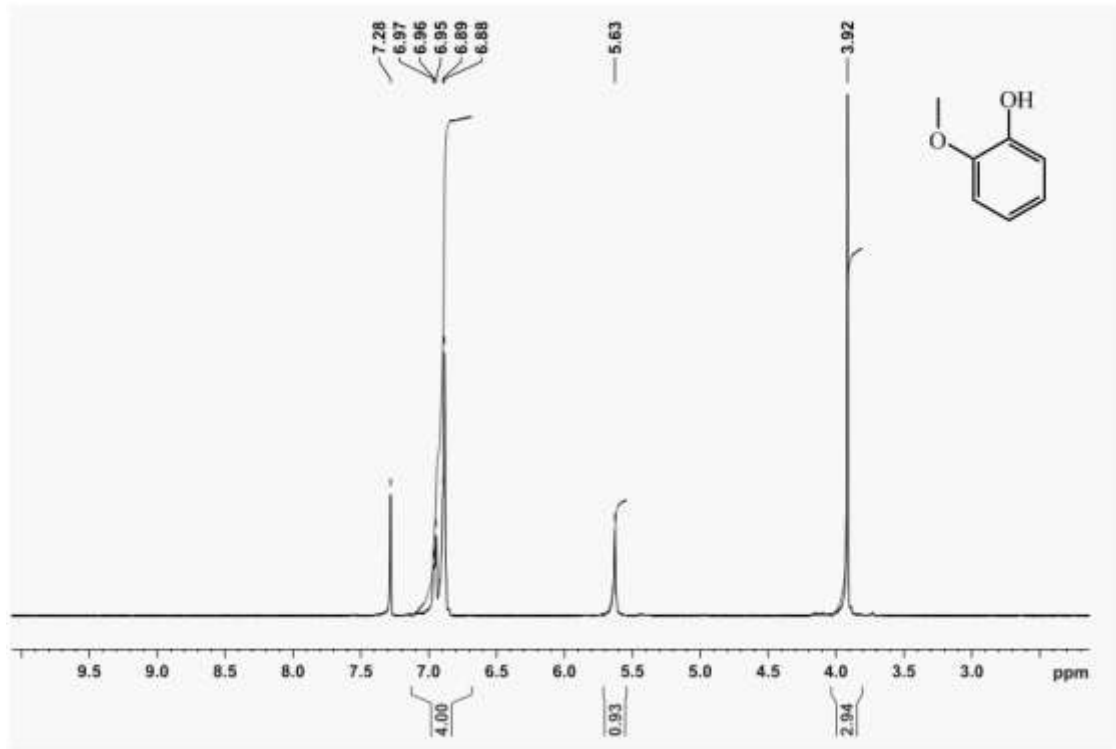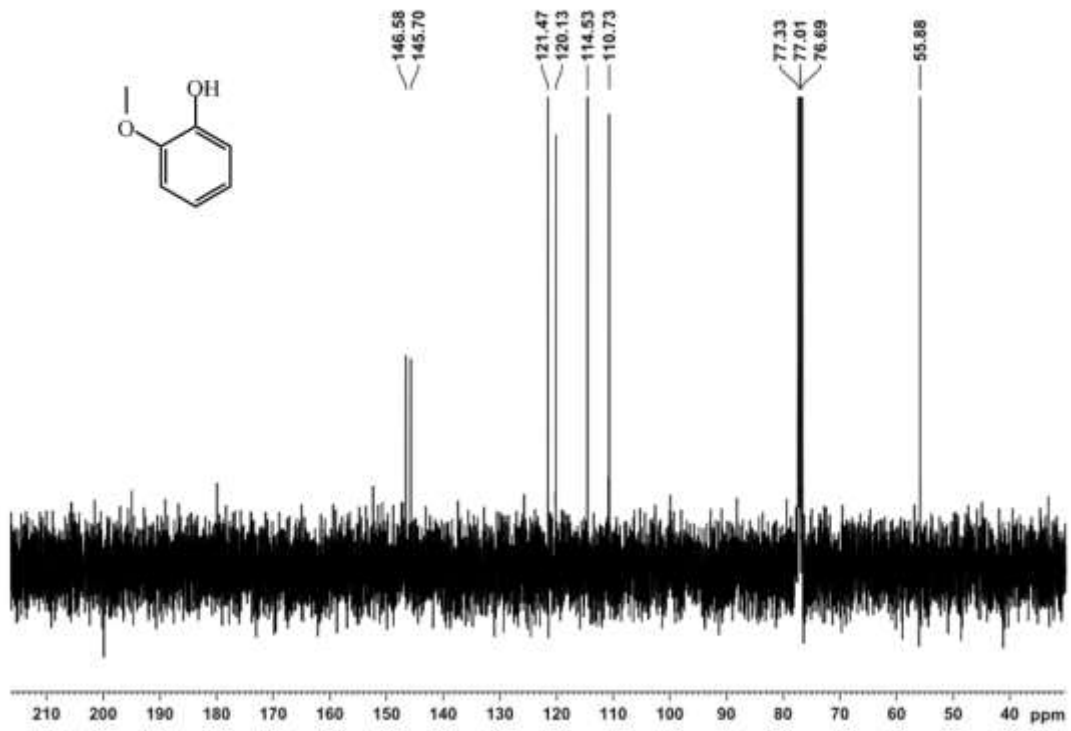

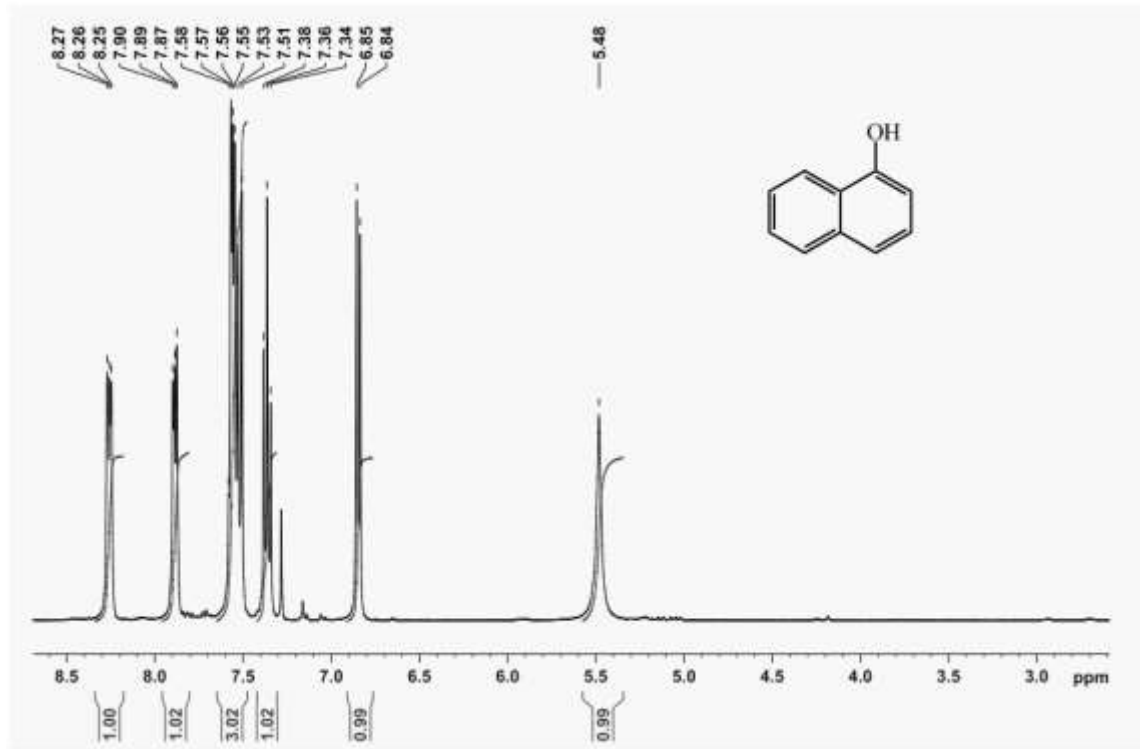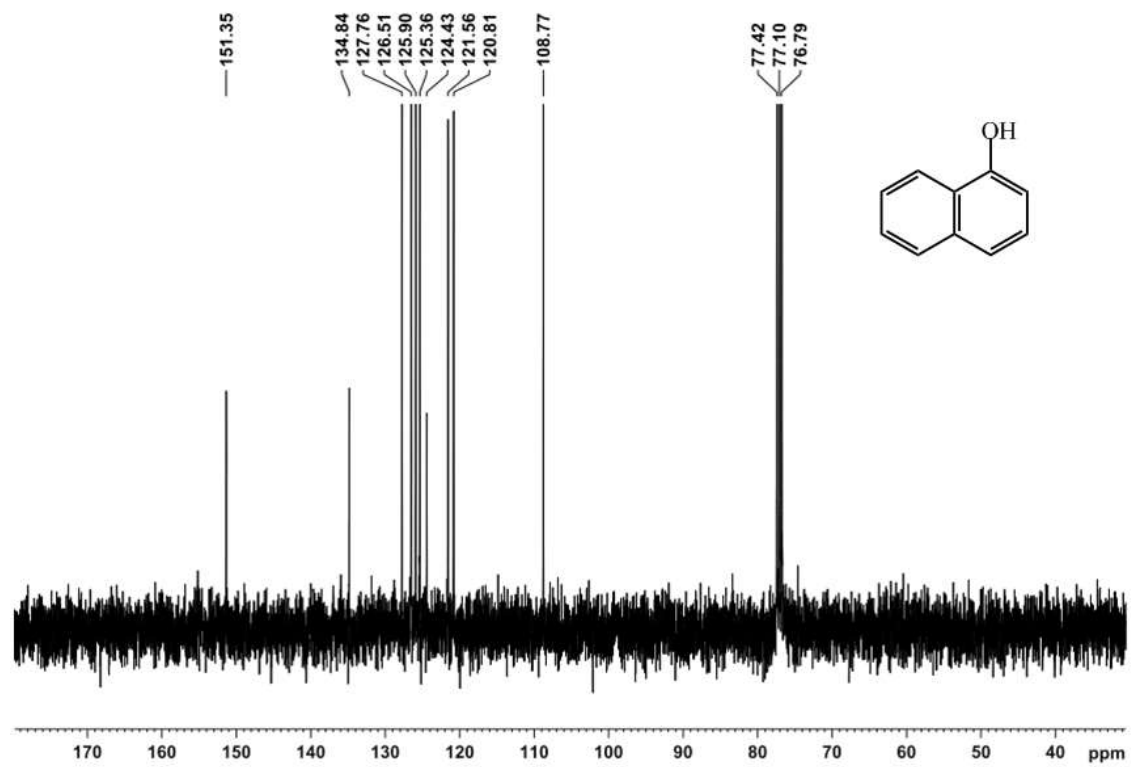



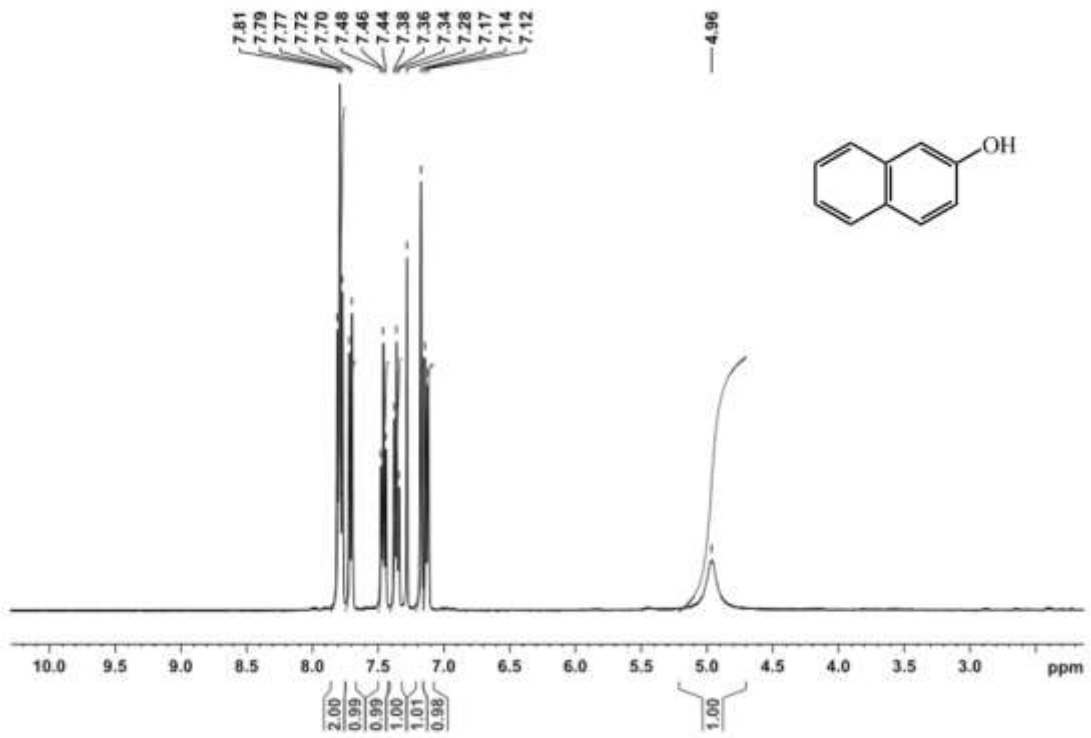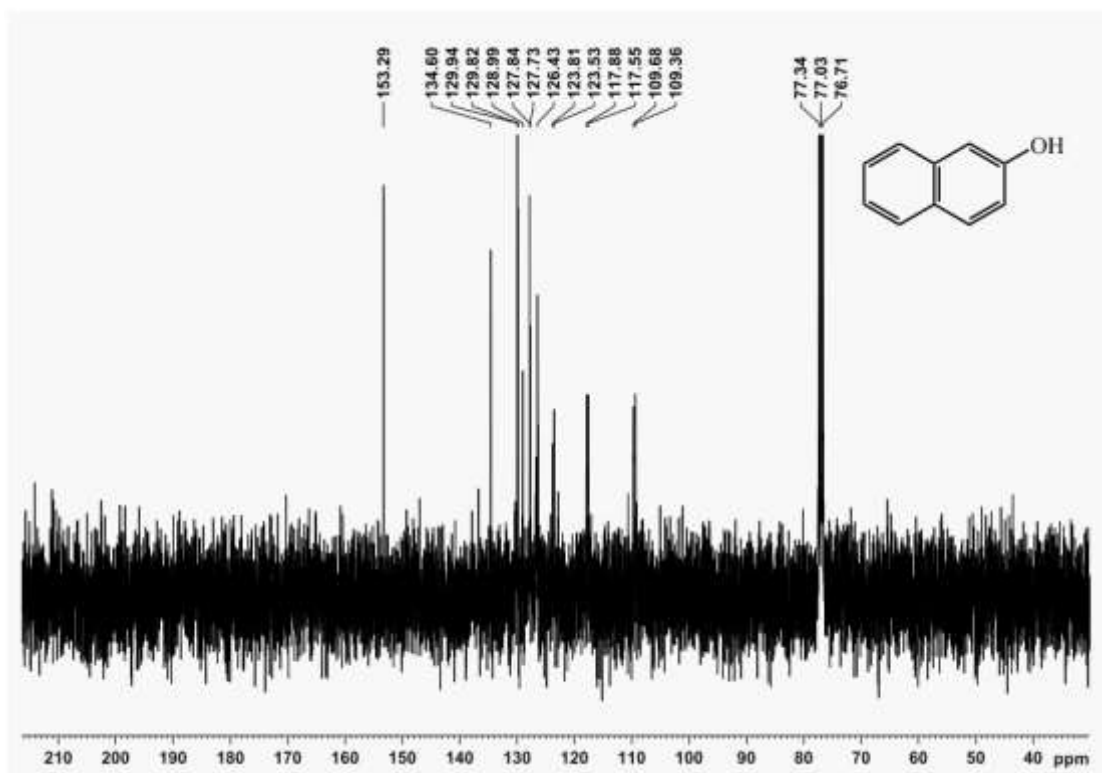

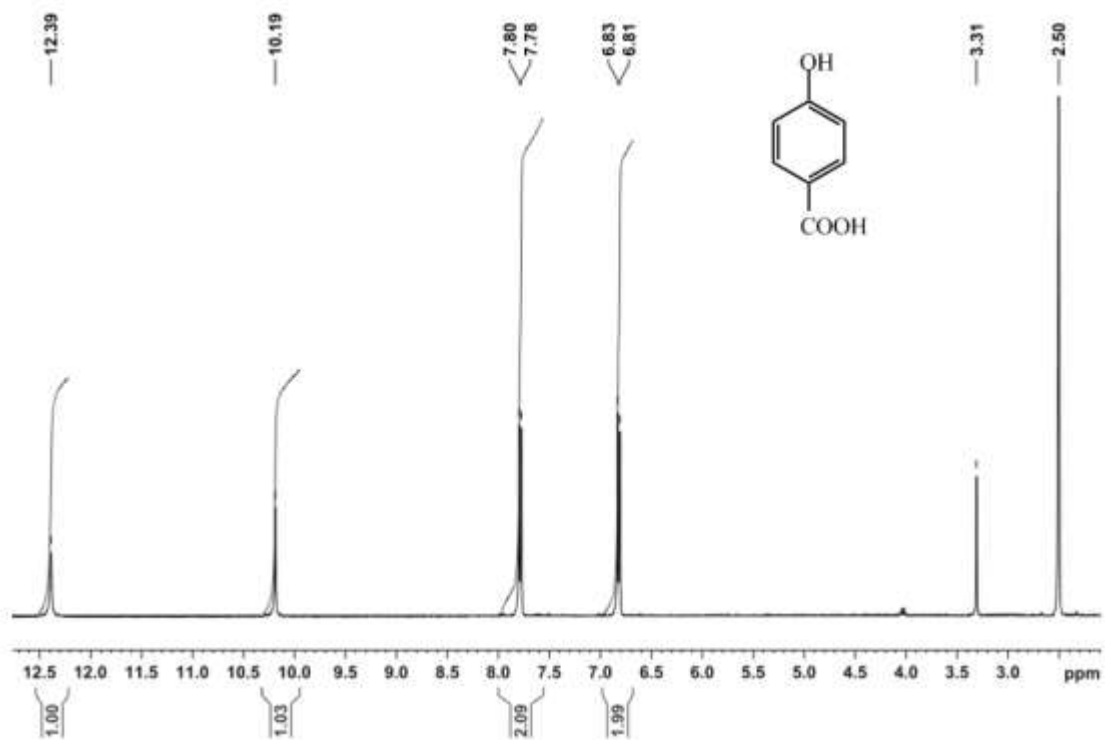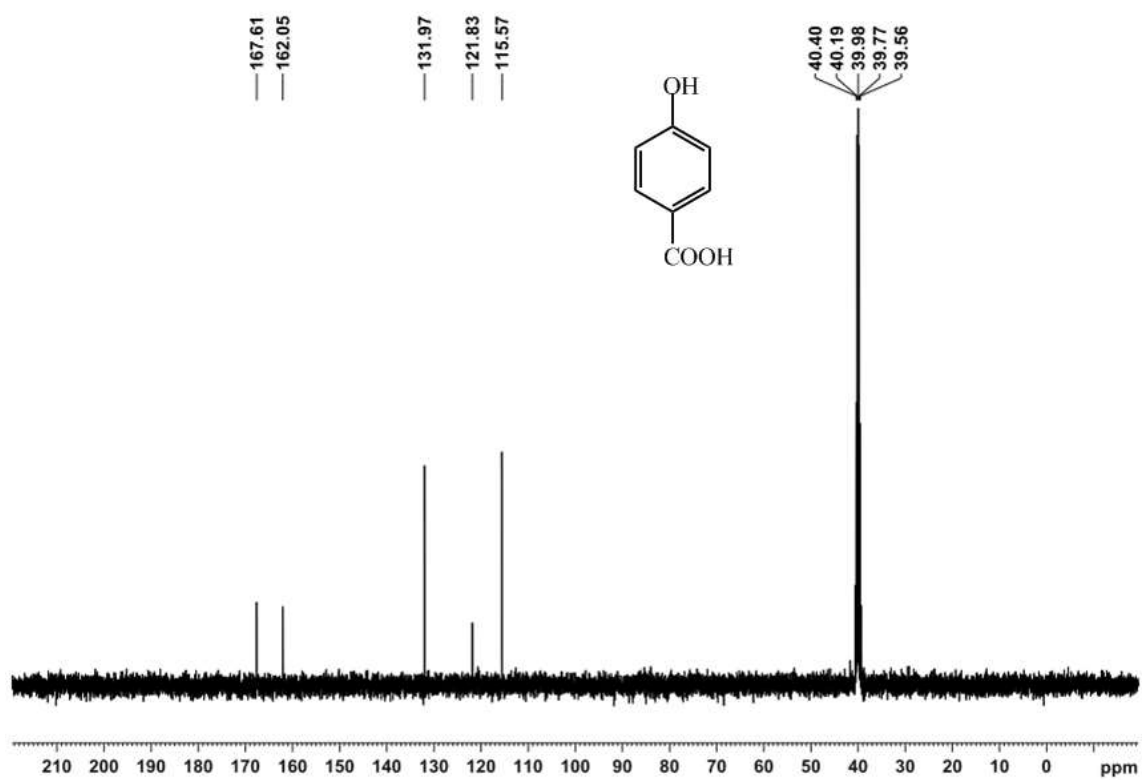

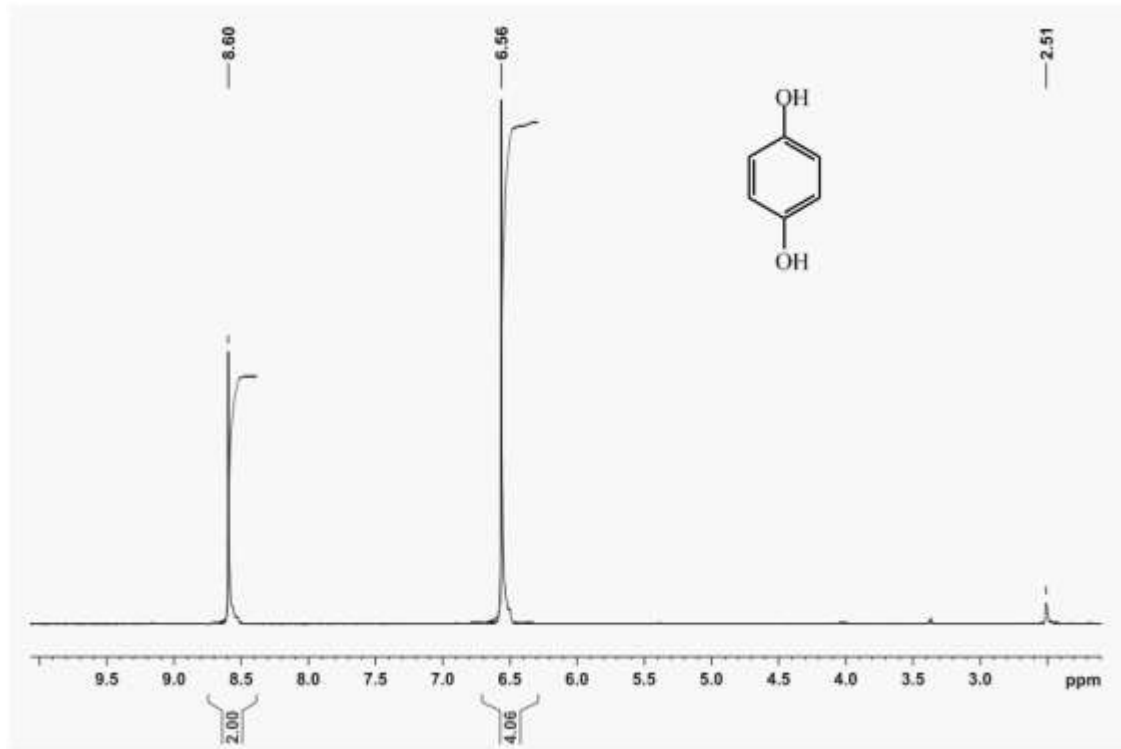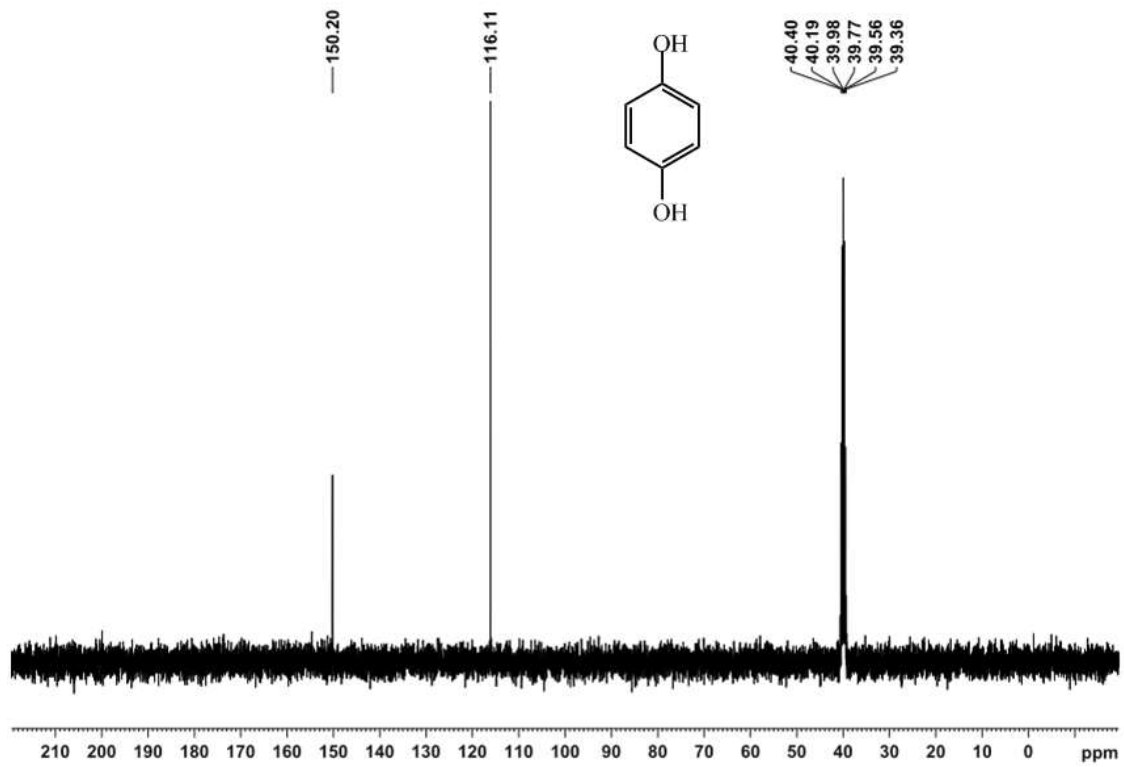

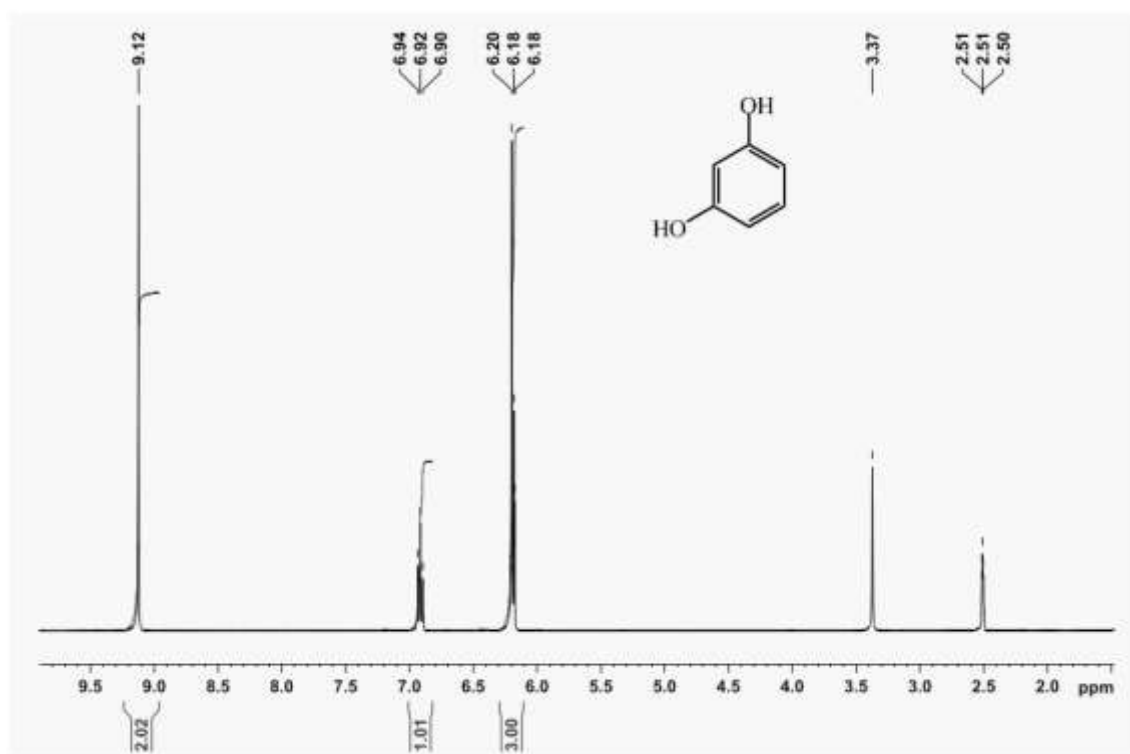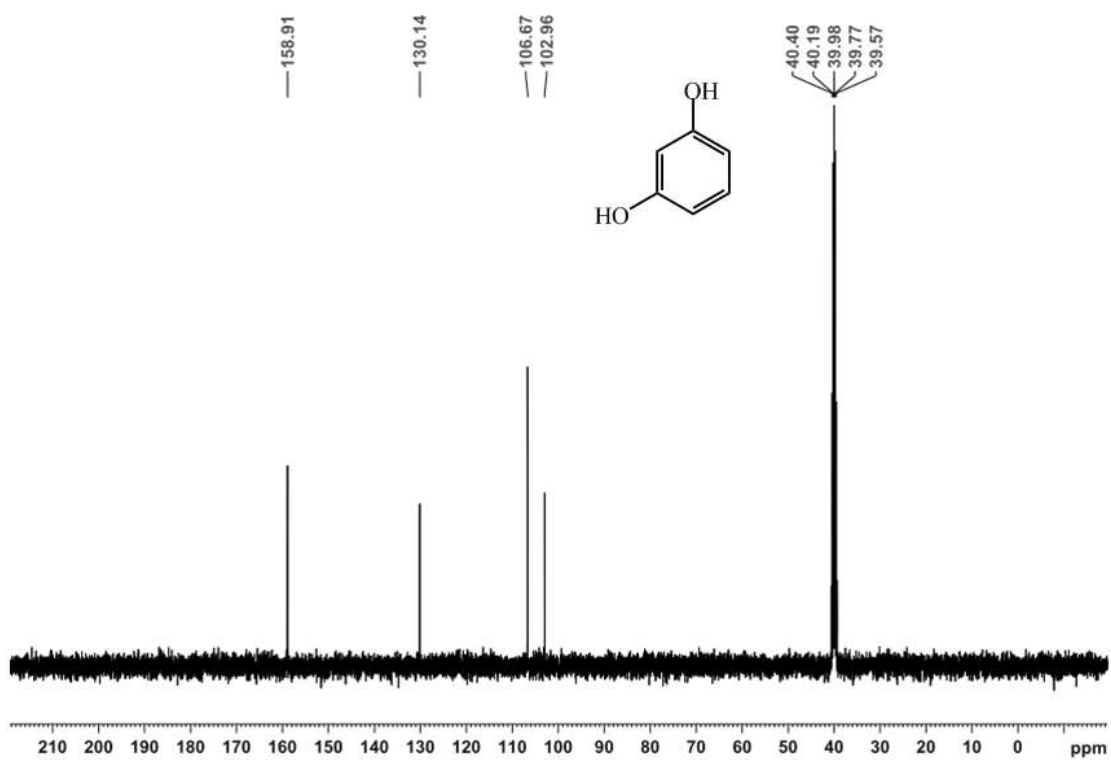

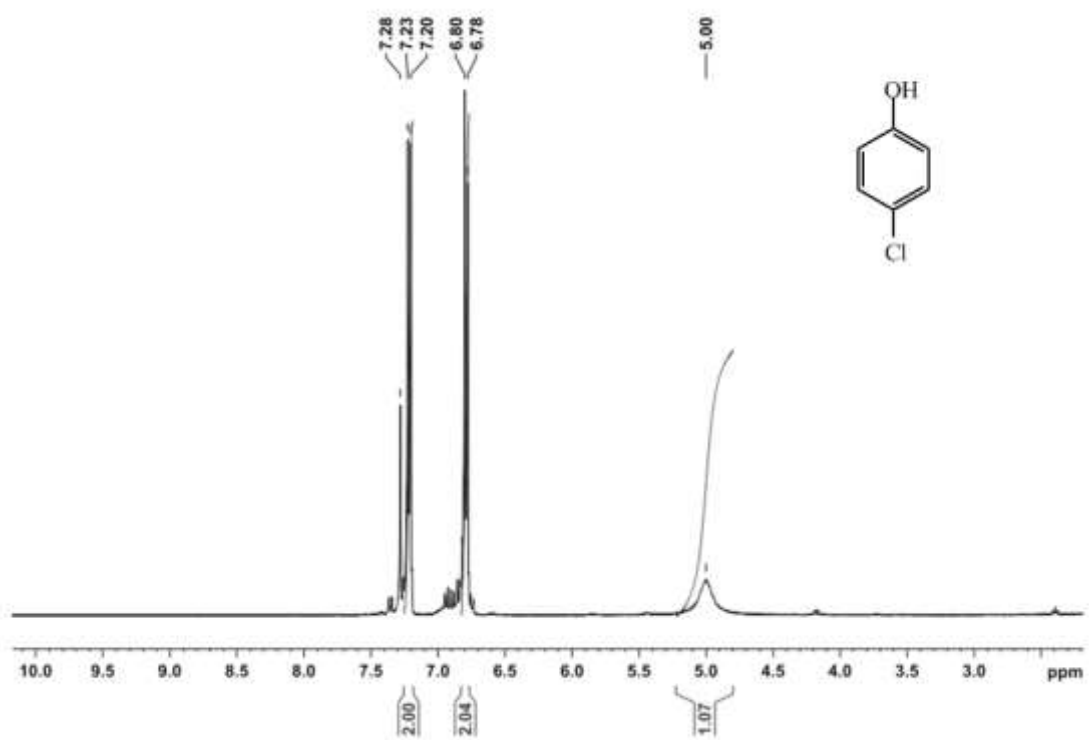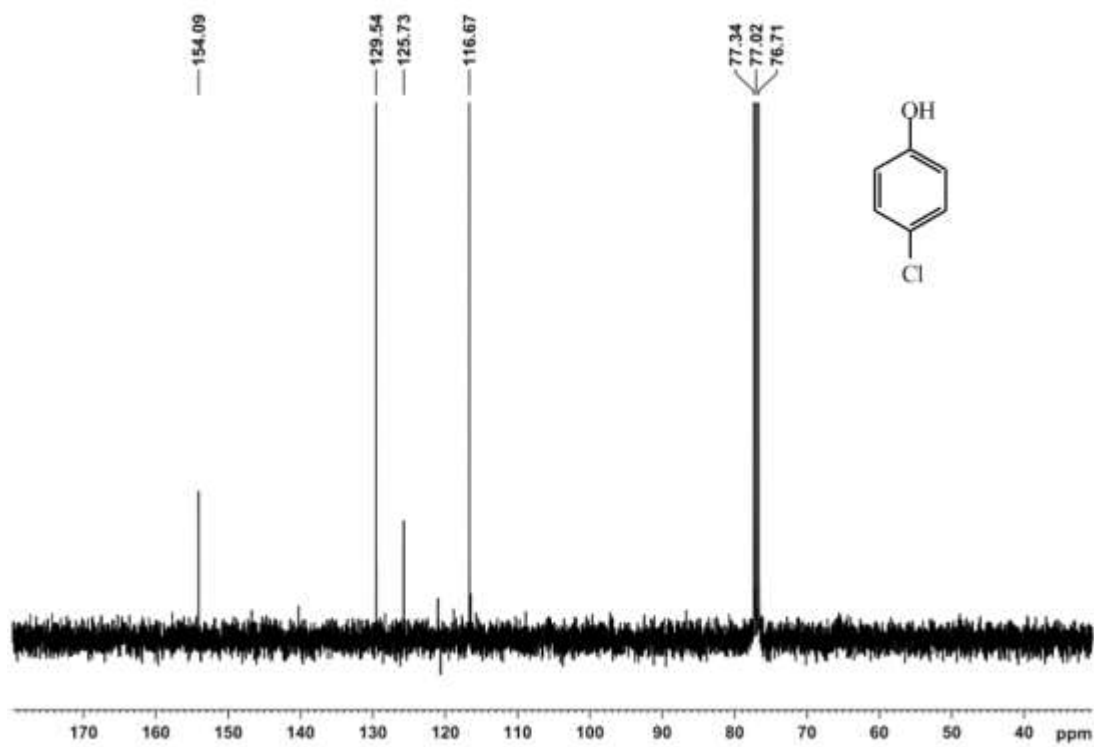

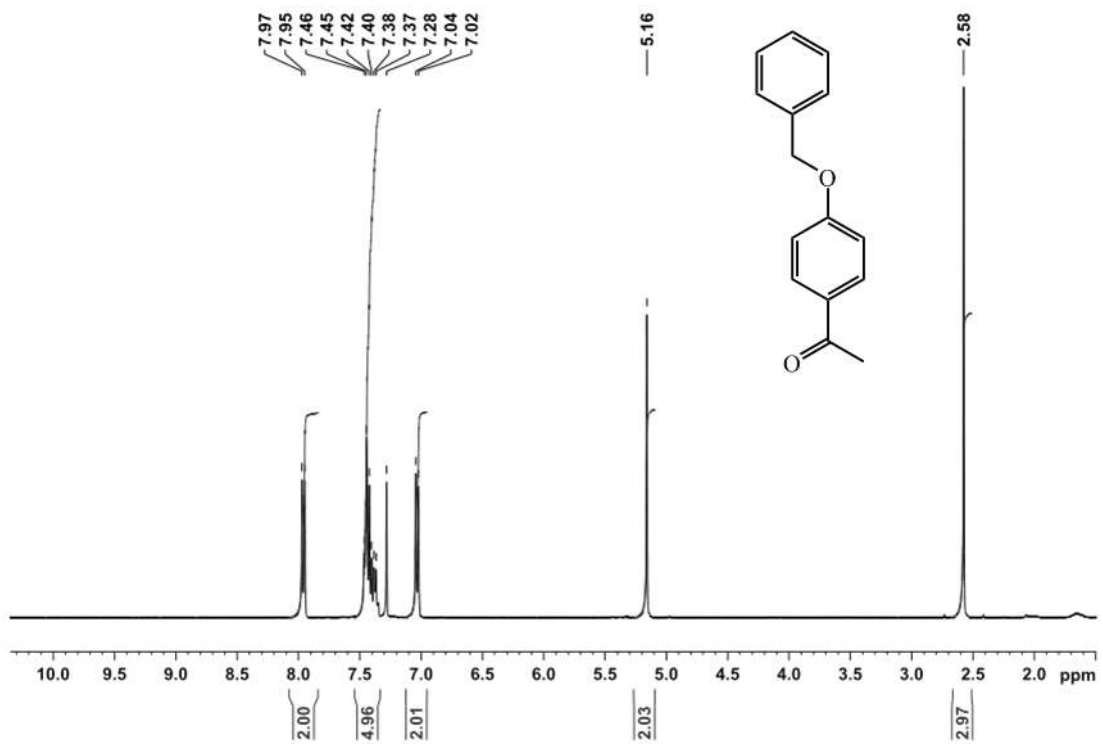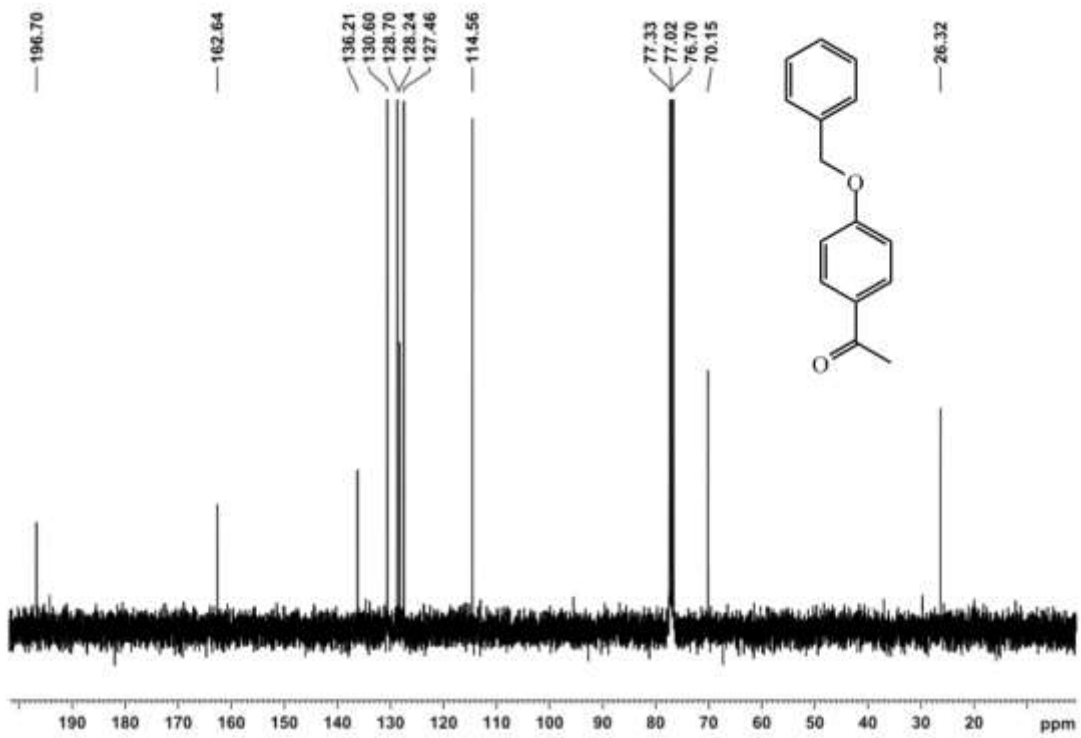

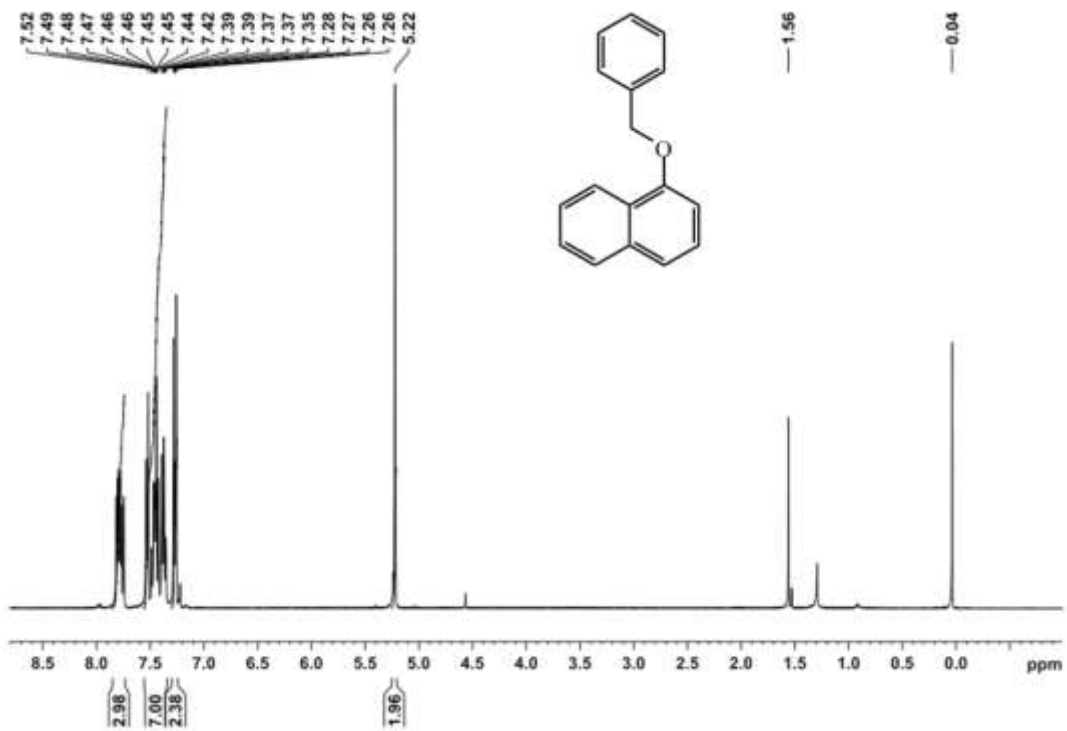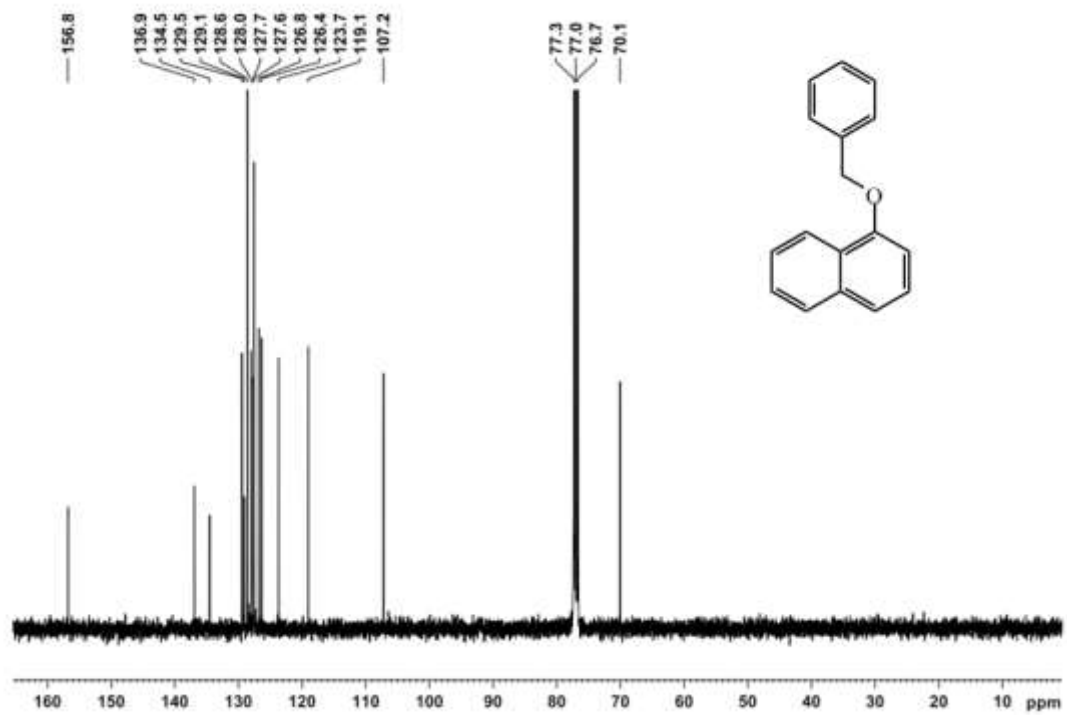

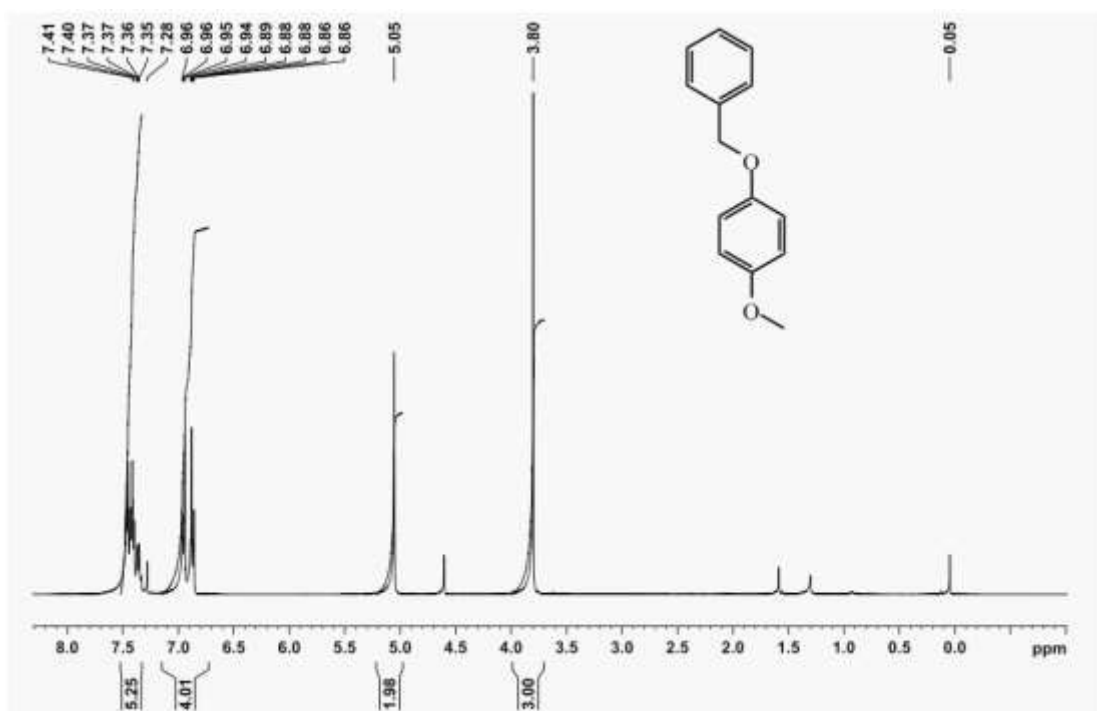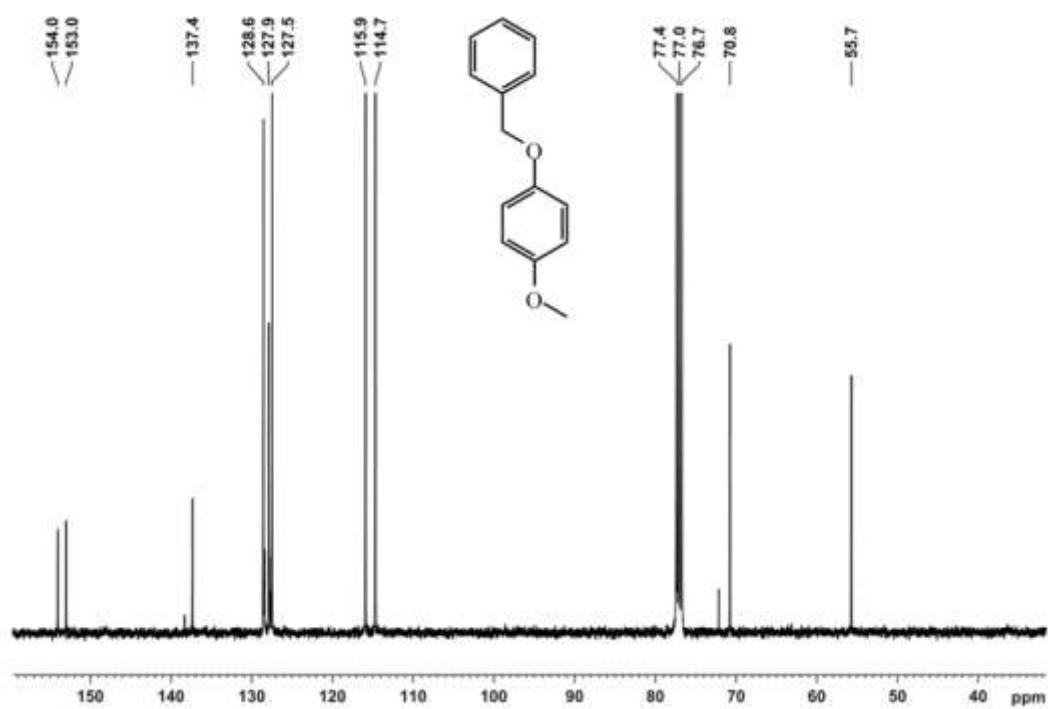



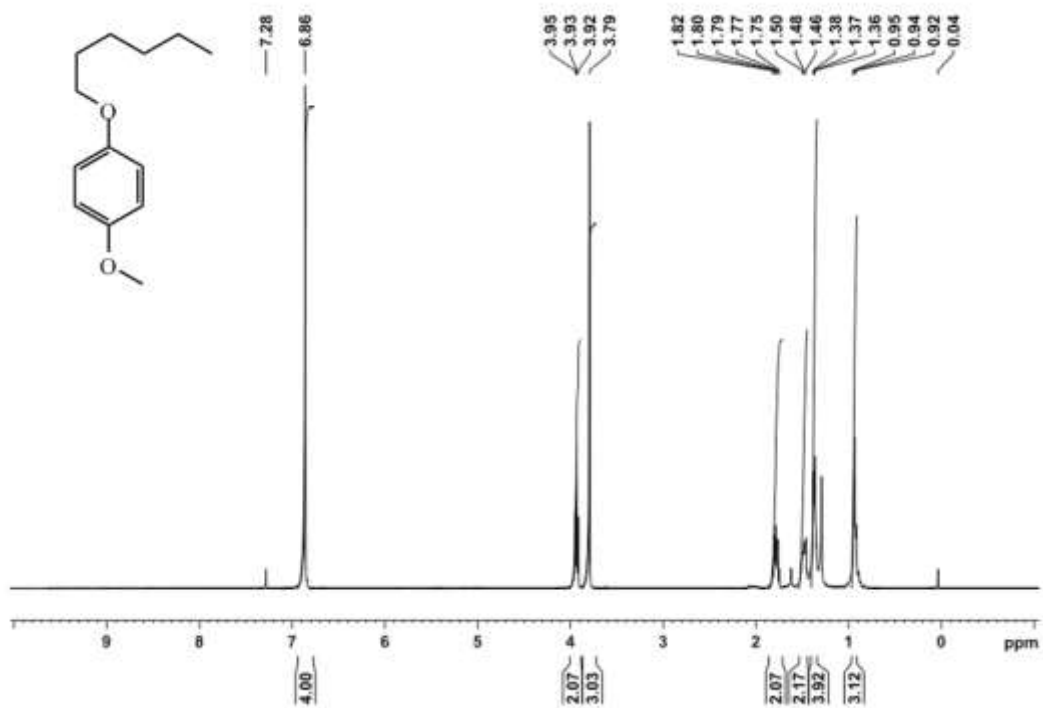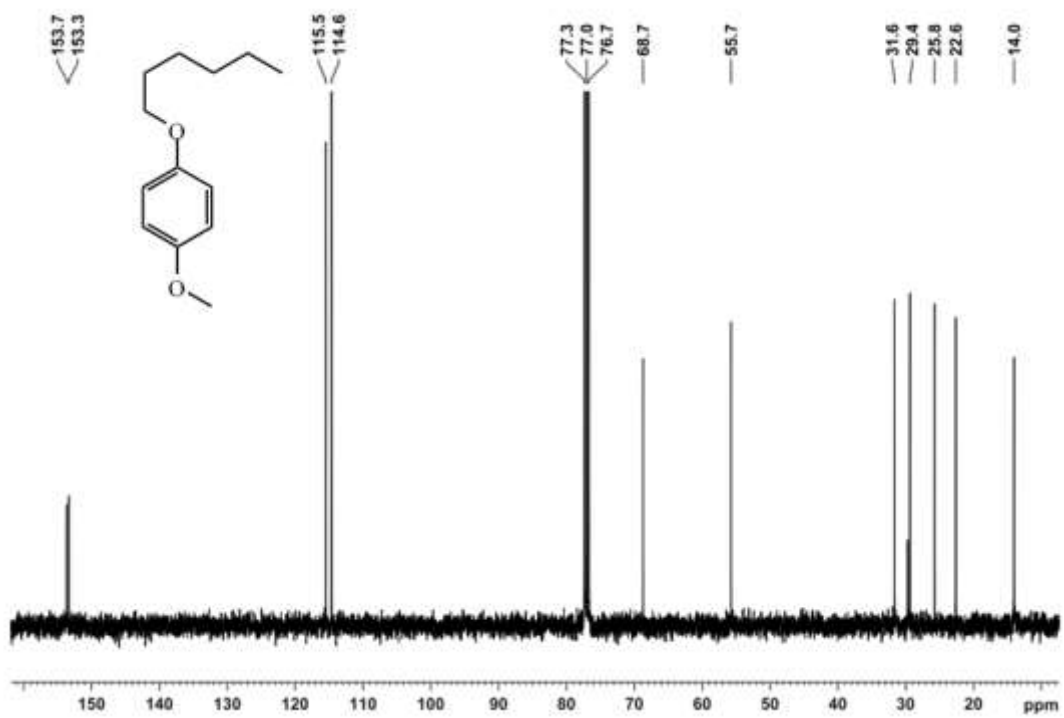

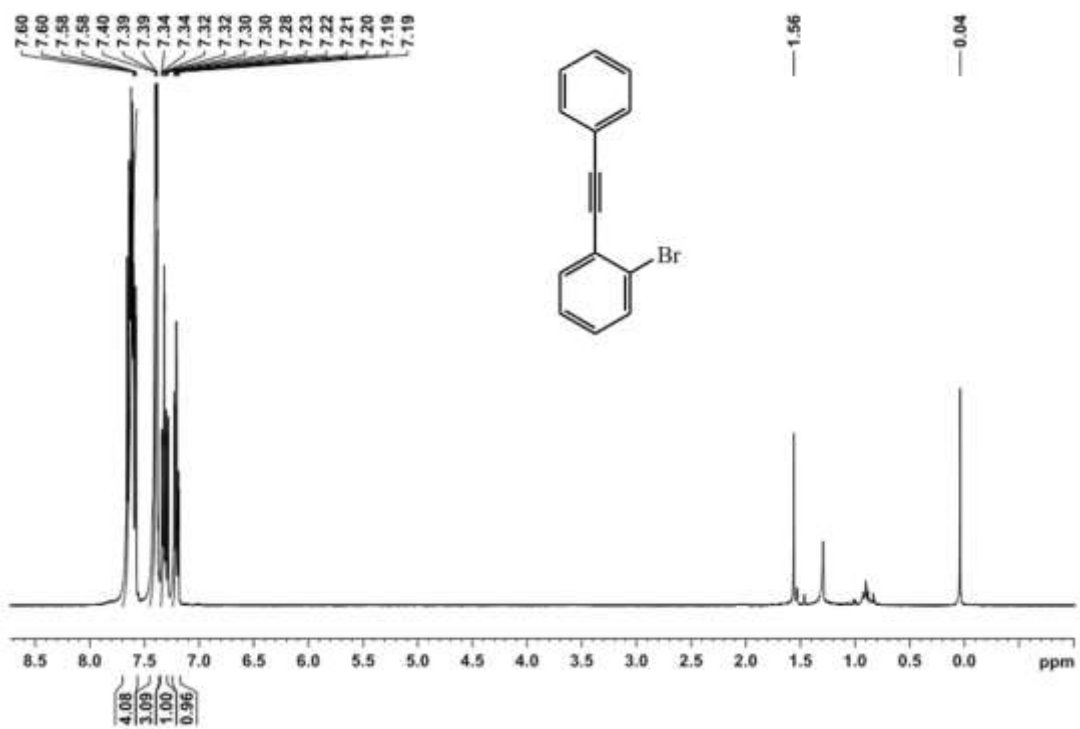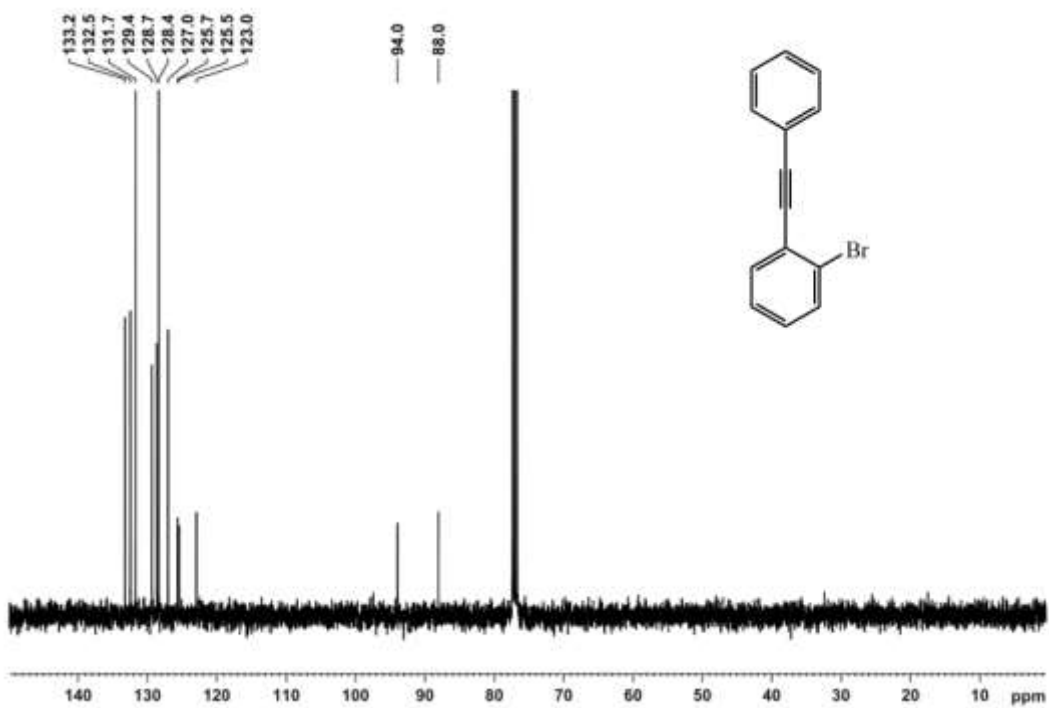

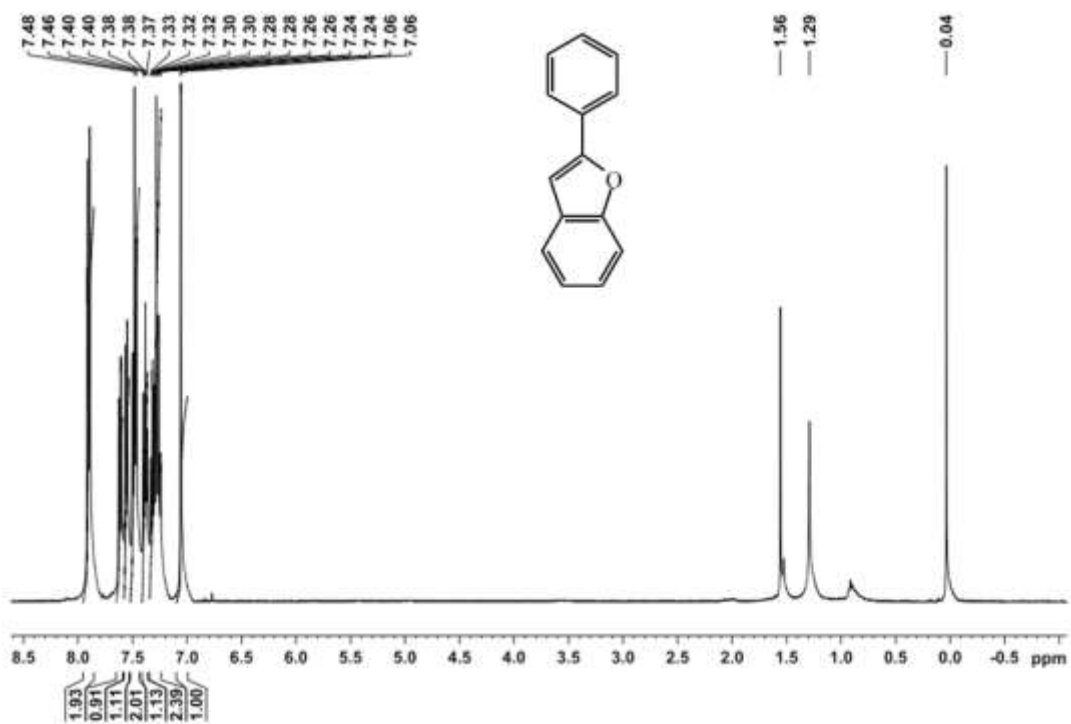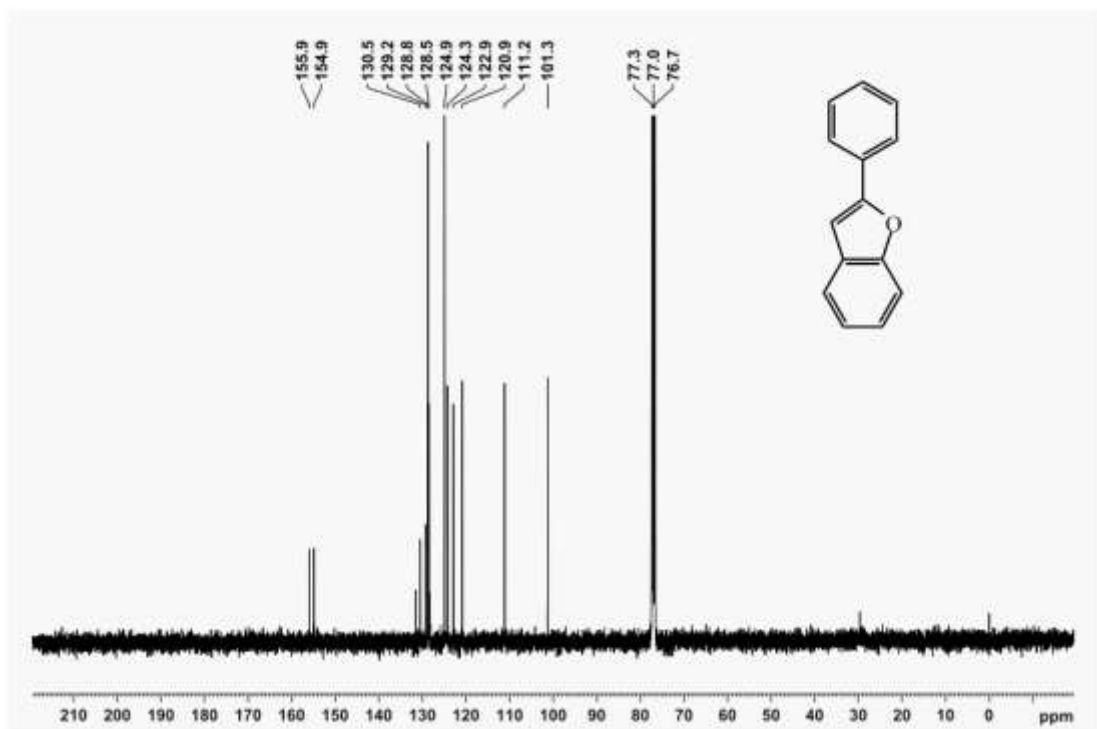

## References:

1. K. Yang, Z. Li, Z. Wang, Z. Yao and S. Jiang, *Org. Lett.*, 2011, **13**, 4340-4343.
2. K. Inamoto, K. Nozawa, M. Yonemoto and Y. Kondo, *Chem. Commun.*, 2011, **47**, 11775-11777.
3. Y. Xiao, Y. Xu, H. S. Cheon and J. Chae, *J. Org. Chem.*, 2013, **78**, 5804-5809.
4. C. W. Cheung and S. L. Buchwald, *J. Org. Chem.*, 2014, **79**, 5351-5358.
5. L. H. Jing, J. T. Wei, L. Zhou, Z. Y. Huang, Z. K. Li and X. G. Zhou, *Chem. Commun.*, 2010, **46**, 4767-4769.
6. C. C. Chan, Y. W. Chen, C. S. Su, H. P. Lin and C. F. Lee, *Eur. J. Org. Chem.*, 2011, 7288-7293.
7. R. Qiu, G. Zhang, Y. Zhu, X. Xu, L. Shao, Y. Li, D. An and S. Yin, *Chem. Eur. J.*, 2009, **15**, 6488-6494.
8. H. Wang, Y. Ma, H. Tian, A. Yu, J. Chang and Y. Wu, *Tetrahedron*, 2014, **70**, 2669-2673.
9. S. Yang, W. Xie, H. Zhou, C. Wu, Y. Yang, J. Niu, W. Yang and J. Xu, *Tetrahedron*, 2013, **69**, 3415-3418.
10. H. J. Chen, Z. Y. Lin, M. Y. Li, R. J. Lian, Q. W. Xue, J. L. Chung, S. C. Chen and Y. J. Chen, *Tetrahedron*, 2010, **66**, 7755-7761.
11. R. Cano, M. Yus and D. J. Ramón, *Tetrahedron*, 2012, **68**, 1393-1400.
